# Supplementary material for: Hyperelatosides A–E, biphenyl ether glycosides from Hypericum elatoides, with neurotrophic activity
Source: Royal Society of Chemistry journal article supplement (doi:10.1039/c8ra05322g), 2018-01-01
Supplement: c8ra05322g1.pdf [file c8ra05322g1.pdf]

**Electronic supplementary information**

**Hyperelatosides A–E, biphenyl ether glycosides from *Hypericum elatoides* with neurotrophic activity**

Xi-Tao Yan,<sup>a</sup> Zhen An,<sup>a</sup> Dan Tang,<sup>a</sup> Guang-Rui Peng,<sup>a</sup> Chen-Yu Cao,<sup>a</sup> Yuan-Zhen Xu,<sup>a</sup> Chun-Huan Li,<sup>a</sup> Pei-Liang Liu,<sup>b</sup> Zai-Min Jiang<sup>c</sup> and Jin-Ming Gao<sup>\*a</sup>

<sup>a</sup> *Shaanxi Key Laboratory of Natural Products & Chemical Biology, College of Chemistry & Pharmacy, Northwest A&F University, Yangling 712100, China.*

<sup>b</sup> *Key Laboratory of Resource Biology and Biotechnology in Western China, College of Life Sciences, Northwest University, Xi'an 710069, China.*

<sup>c</sup> *College of Life Sciences, Northwest A&F University, Yangling 712100, China.*

Corresponding Author

\*Telephone/ Fax: +86-29-8709-2335. E-mail address: [jinminggao@nwsuaf.edu.cn](mailto:jinminggao@nwsuaf.edu.cn) (J. M. Gao).

## List of Contents

- Figure S1.**  $^1\text{H}$  NMR spectrum (500 MHz) of **1** in  $\text{CD}_3\text{OD}$
- Figure S2.**  $^{13}\text{C}$  NMR spectrum (125 MHz) of **1** in  $\text{CD}_3\text{OD}$
- Figure S3.** DEPT-90 spectrum (125 MHz) of **1** in  $\text{CD}_3\text{OD}$
- Figure S4.** DEPT-135 spectrum (125 MHz) of **1** in  $\text{CD}_3\text{OD}$
- Figure S5.** COSY spectrum (500 MHz) of **1** in  $\text{CD}_3\text{OD}$
- Figure S6.** HSQC spectrum (500 MHz) of **1** in  $\text{CD}_3\text{OD}$
- Figure S7.** HMBC spectrum (500 MHz) of **1** in  $\text{CD}_3\text{OD}$
- Figure S8.**  $^1\text{H}$  NMR spectrum (500 MHz) of **1** in  $\text{DMSO}-d_6$
- Figure S9.**  $^{13}\text{C}$  NMR spectrum (125 MHz) of **1** in  $\text{DMSO}-d_6$
- Figure S10.** COSY spectrum (500 MHz) of **1** in  $\text{DMSO}-d_6$
- Figure S11.** HSQC spectrum (500 MHz) of **1** in  $\text{DMSO}-d_6$
- Figure S12.** HMBC spectrum (500 MHz) of **1** in  $\text{DMSO}-d_6$
- Figure S13.** ESIMS spectrum of **1**
- Figure S14.** HRESIMS spectrum of **1**
- Figure S15.**  $^1\text{H}$  NMR spectrum (500 MHz) of **2** in  $\text{CD}_3\text{OD}$
- Figure S16.**  $^{13}\text{C}$  NMR spectrum (125 MHz) of **2** in  $\text{CD}_3\text{OD}$
- Figure S17.** DEPT-90 spectrum (125 MHz) of **2** in  $\text{CD}_3\text{OD}$
- Figure S18.** DEPT-135 spectrum (125 MHz) of **2** in  $\text{CD}_3\text{OD}$
- Figure S19.** COSY spectrum (500 MHz) of **2** in  $\text{CD}_3\text{OD}$
- Figure S20.** HSQC spectrum (500 MHz) of **2** in  $\text{CD}_3\text{OD}$
- Figure S21.** HMBC spectrum (500 MHz) of **2** in  $\text{CD}_3\text{OD}$
- Figure S22.** HRESIMS spectrum of **2**
- Figure S23.**  $^1\text{H}$  NMR spectrum (500 MHz) of **3** in  $\text{CD}_3\text{OD}$
- Figure S24.**  $^{13}\text{C}$  NMR spectrum (125 MHz) of **3** in  $\text{CD}_3\text{OD}$
- Figure S25.** DEPT-90 spectrum (125 MHz) of **3** in  $\text{CD}_3\text{OD}$
- Figure S26.** DEPT-135 spectrum (125 MHz) of **3** in  $\text{CD}_3\text{OD}$
- Figure S27.** COSY spectrum (500 MHz) of **3** in  $\text{CD}_3\text{OD}$
- Figure S28.** HSQC spectrum (500 MHz) of **3** in  $\text{CD}_3\text{OD}$
- Figure S29.** HMBC spectrum (500 MHz) of **3** in  $\text{CD}_3\text{OD}$
- Figure S30.** HRESIMS spectrum of **3**
- Figure S31.**  $^1\text{H}$  NMR spectrum (500 MHz) of **4** in  $\text{CD}_3\text{OD}$
- Figure S32.**  $^{13}\text{C}$  NMR spectrum (125 MHz) of **4** in  $\text{CD}_3\text{OD}$
- Figure S33.** DEPT-90 spectrum (125 MHz) of **4** in  $\text{CD}_3\text{OD}$

**Figure S34.** DEPT-135 spectrum (125 MHz) of **4** in CD<sub>3</sub>OD  
**Figure S35.** COSY spectrum (500 MHz) of **4** in CD<sub>3</sub>OD  
**Figure S36.** HSQC spectrum (500 MHz) of **4** in CD<sub>3</sub>OD  
**Figure S37.** HMBC spectrum (500 MHz) of **4** in CD<sub>3</sub>OD  
**Figure S38.** <sup>1</sup>H NMR spectrum (500 MHz) of **4** in DMSO-*d*<sub>6</sub>  
**Figure S39.** <sup>13</sup>C NMR spectrum (125 MHz) of **4** in DMSO-*d*<sub>6</sub>  
**Figure S40.** HMBC spectrum (500 MHz) of **4** in DMSO-*d*<sub>6</sub>  
**Figure S41.** ESIMS spectrum of **4**  
**Figure S42.** HRESIMS spectrum of **4**  
**Figure S43.** <sup>1</sup>H NMR spectrum (500 MHz) of **5** in CD<sub>3</sub>OD  
**Figure S44.** <sup>13</sup>C NMR spectrum (125 MHz) of **5** in CD<sub>3</sub>OD  
**Figure S45.** COSY spectrum (500 MHz) of **5** in CD<sub>3</sub>OD  
**Figure S46.** HSQC spectrum (500 MHz) of **5** in CD<sub>3</sub>OD  
**Figure S47.** HMBC spectrum (500 MHz) of **5** in CD<sub>3</sub>OD  
**Figure S48.** HRESIMS spectrum of **5**  
**Figure S49.** <sup>1</sup>H NMR spectrum (500 MHz) of **6** in DMSO-*d*<sub>6</sub>  
**Figure S50.** <sup>13</sup>C NMR spectrum (125 MHz) of **6** in DMSO-*d*<sub>6</sub>  
**Figure S51.** HSQC spectrum (500 MHz) of **6** in DMSO-*d*<sub>6</sub>  
**Figure S52.** HMBC spectrum (500 MHz) of **6** in DMSO-*d*<sub>6</sub>  
**Figure S53.** HRESIMS spectrum of **6**  
**Figure S54.** Chemical structures of **7–15** from *Hypericum elatoides*

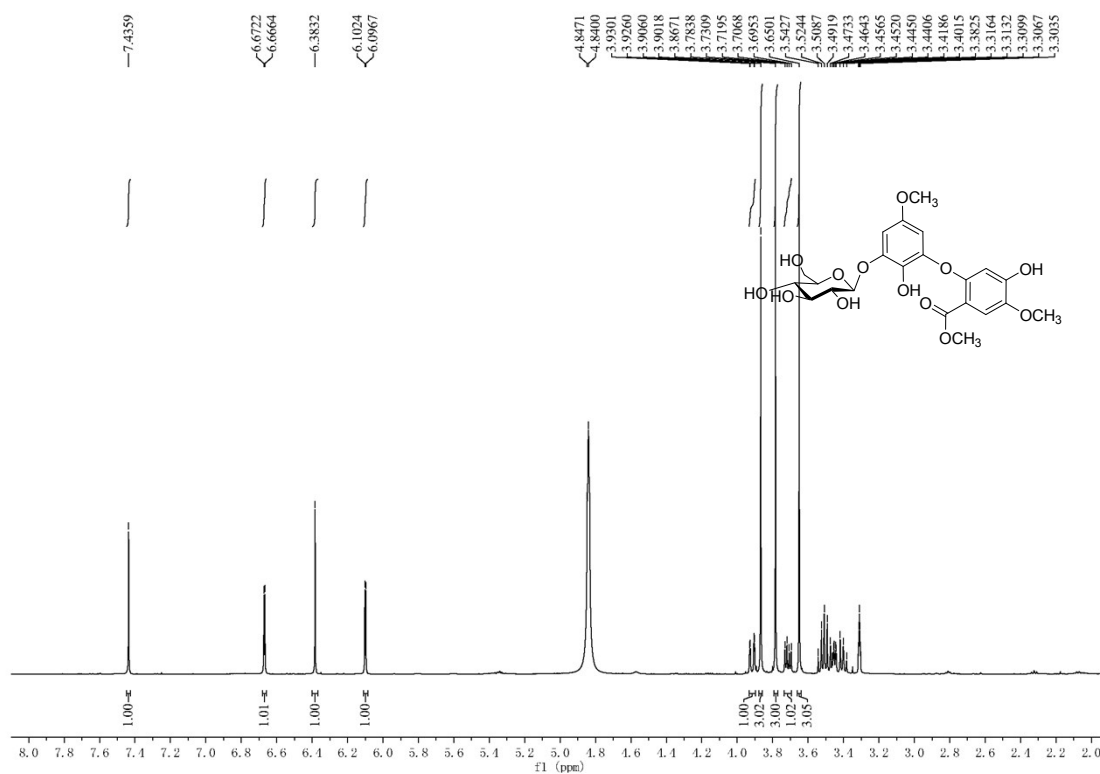

Figure S1.  $^1\text{H}$  NMR spectrum (500 MHz) of **1** in  $\text{CD}_3\text{OD}$

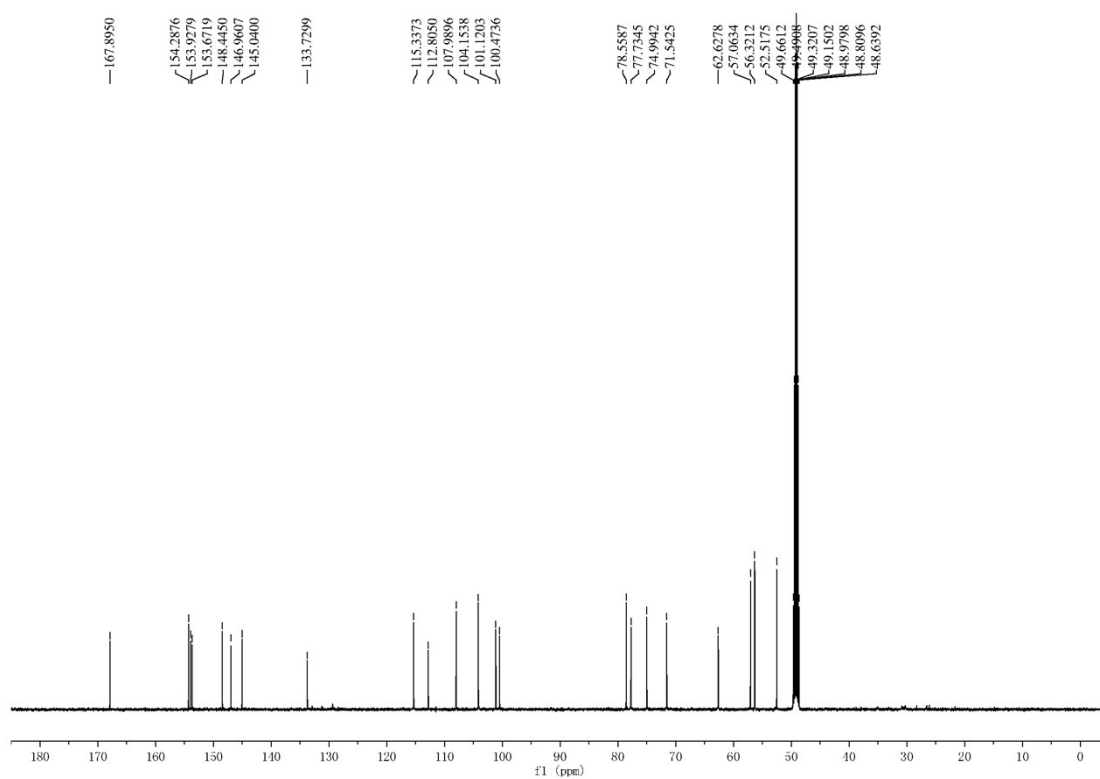

Figure S2.  $^{13}\text{C}$  NMR spectrum (125 MHz) of **1** in  $\text{CD}_3\text{OD}$

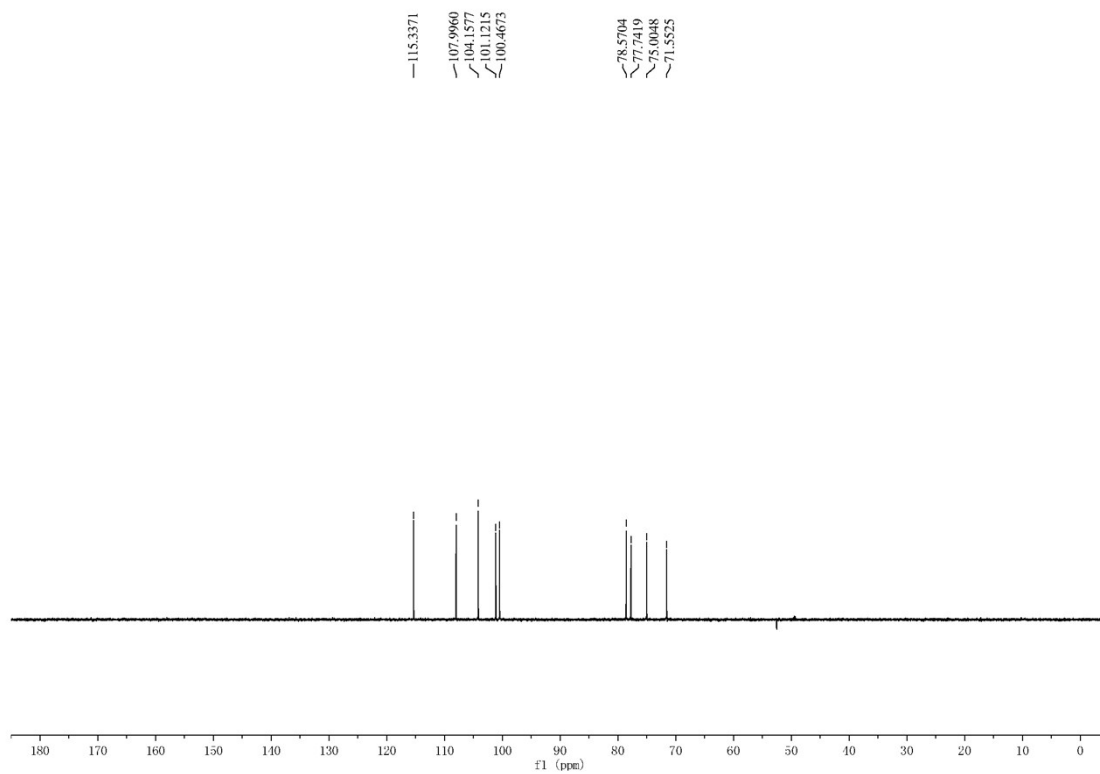

**Figure S3.** DEPT-90 spectrum (125 MHz) of **1** in CD<sub>3</sub>OD

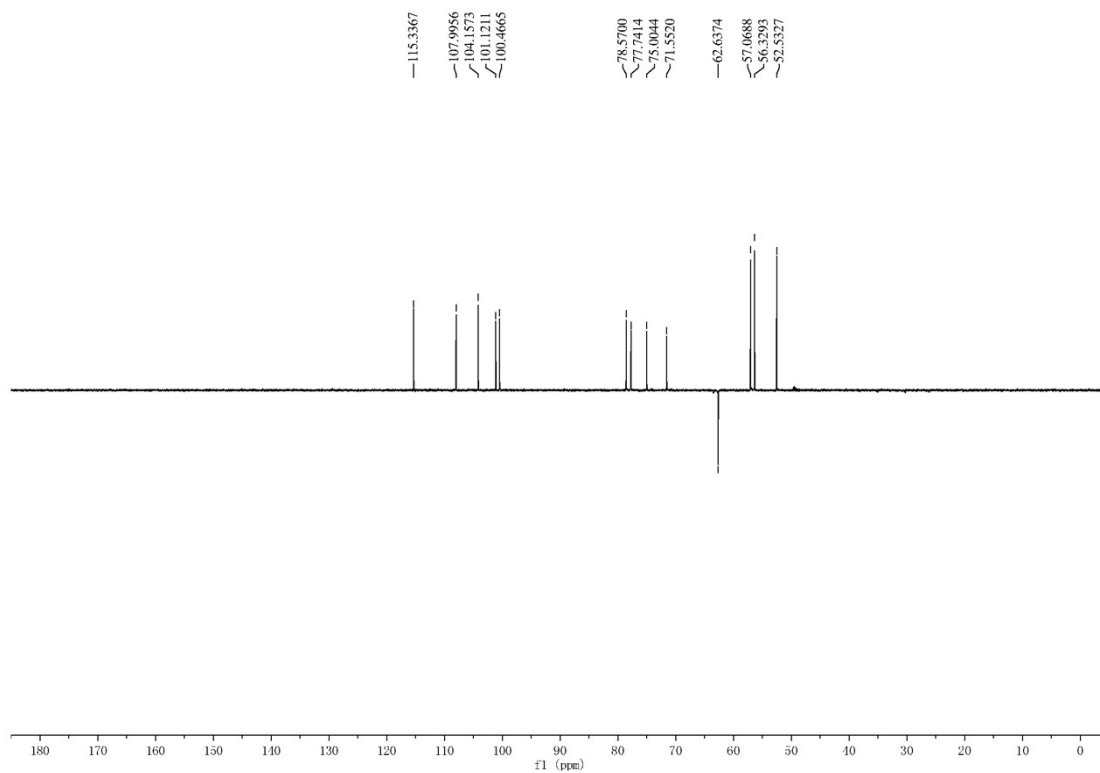

**Figure S4.** DEPT-135 spectrum (125 MHz) of **1** in CD<sub>3</sub>OD

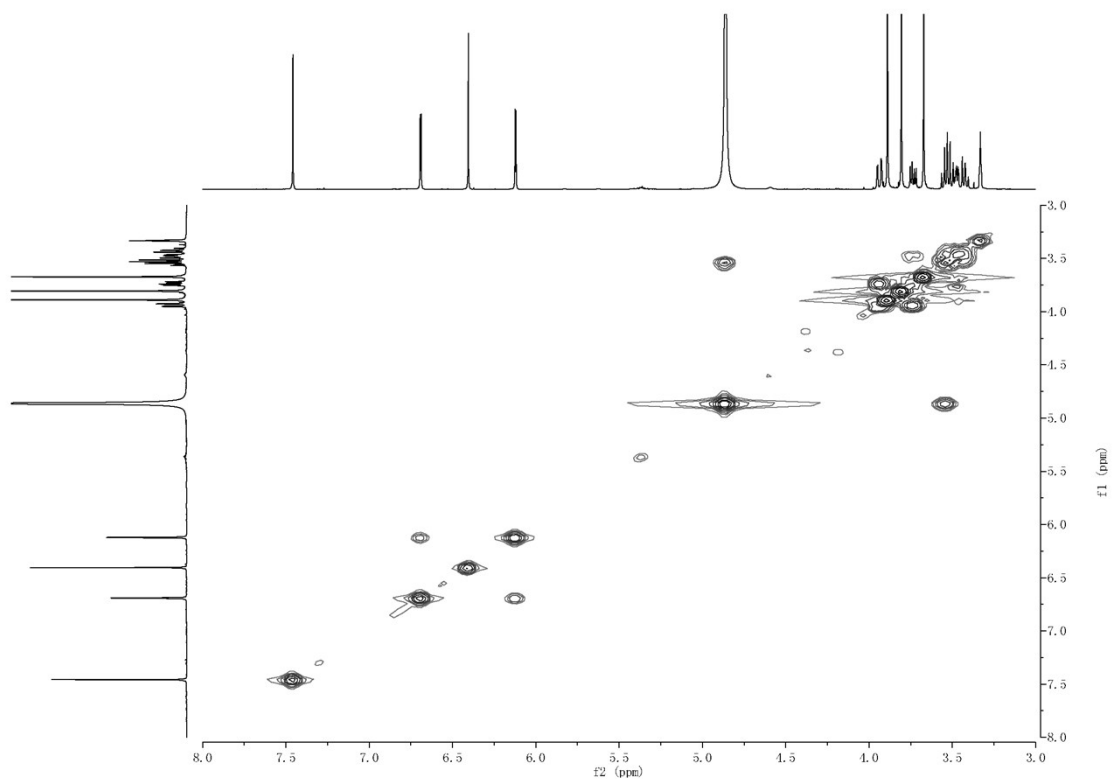

**Figure S5.** COSY spectrum (500 MHz) of **1** in CD<sub>3</sub>OD

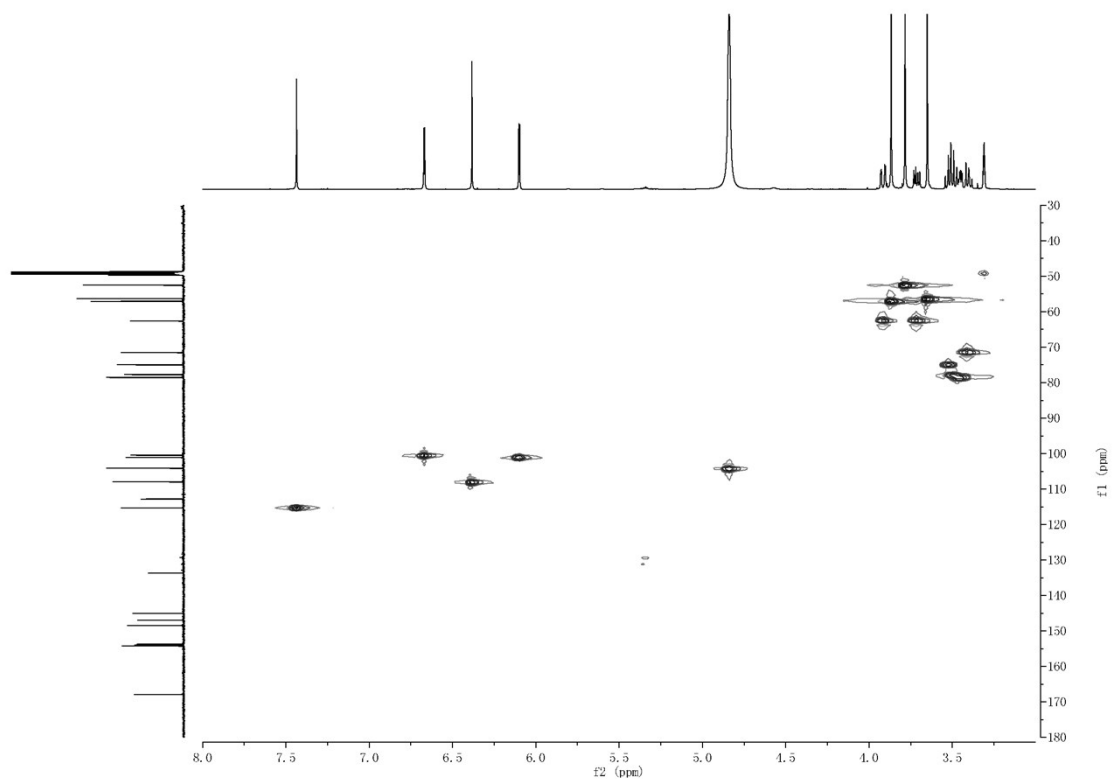

**Figure S6.** HSQC spectrum (500 MHz) of **1** in CD<sub>3</sub>OD

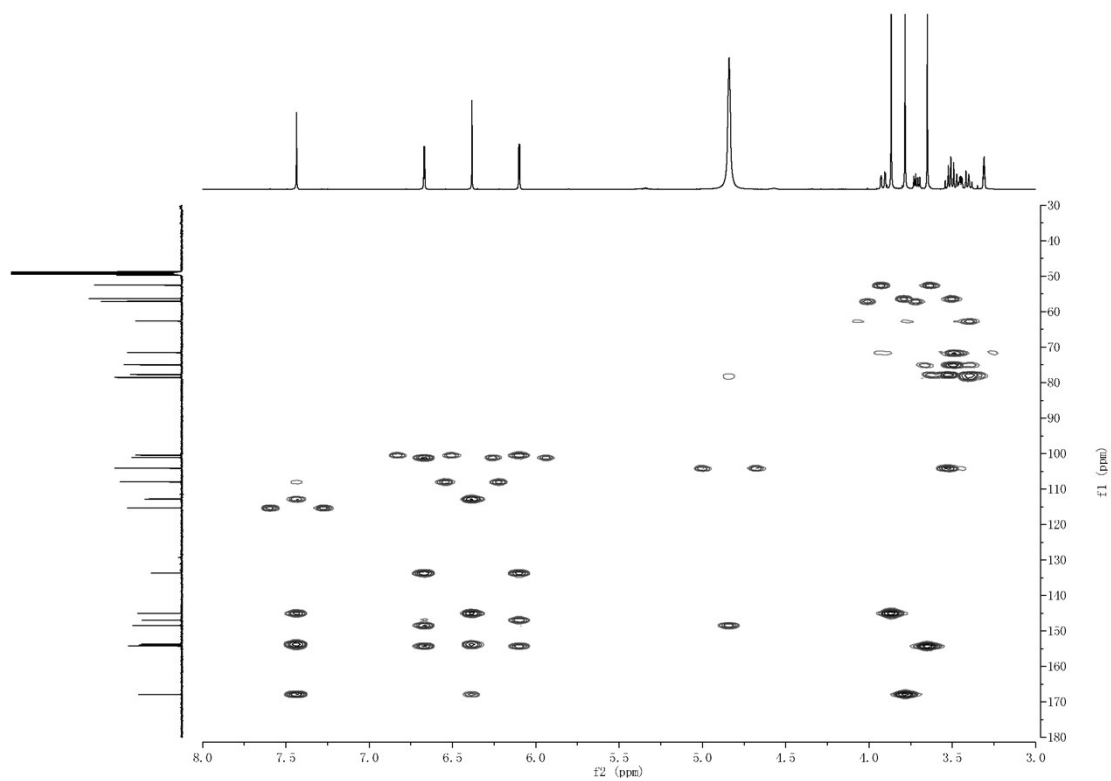

**Figure S7.** HMBC spectrum (500 MHz) of **1** in CD<sub>3</sub>OD

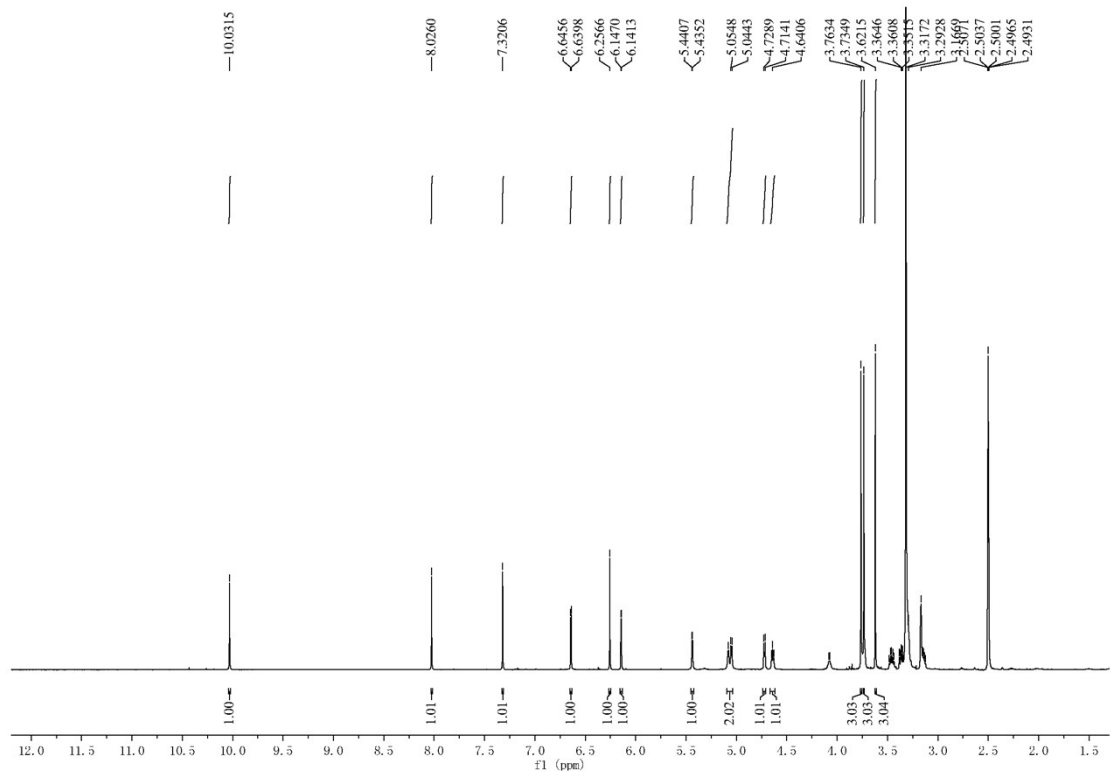

**Figure S8.** <sup>1</sup>H NMR spectrum (500 MHz) of **1** in DMSO-*d*<sub>6</sub>

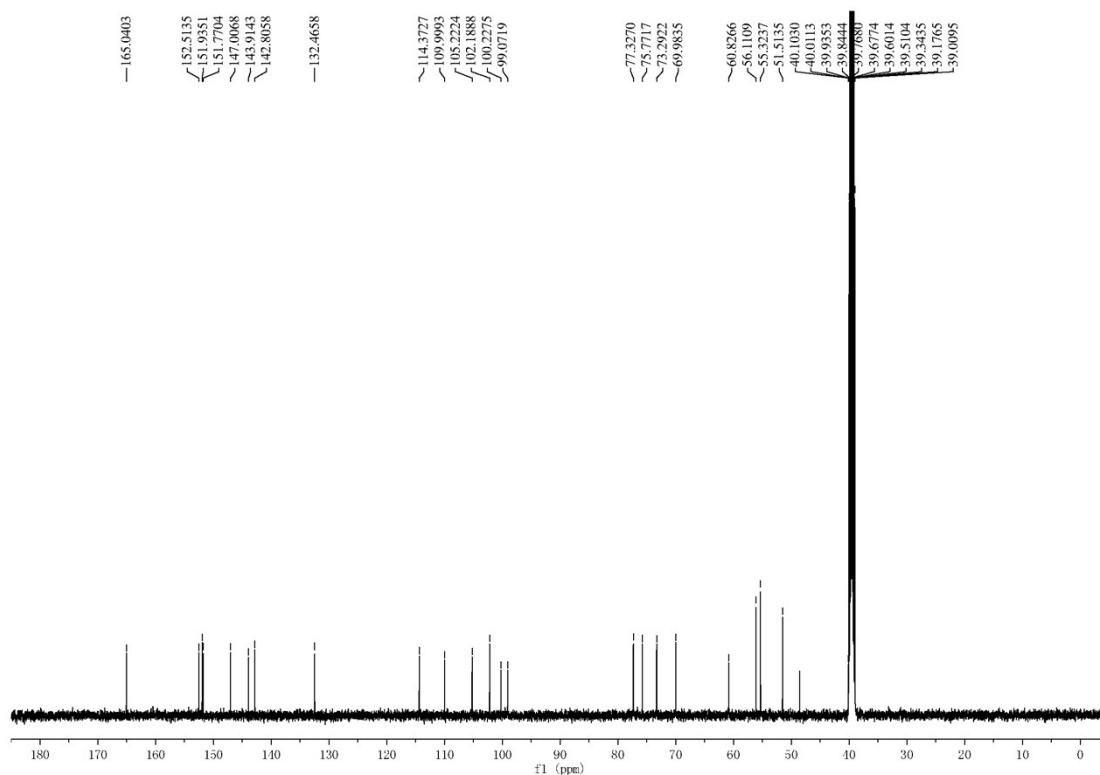

Figure S9.  $^{13}\text{C}$  NMR spectrum (125 MHz) of **1** in  $\text{DMSO-}d_6$

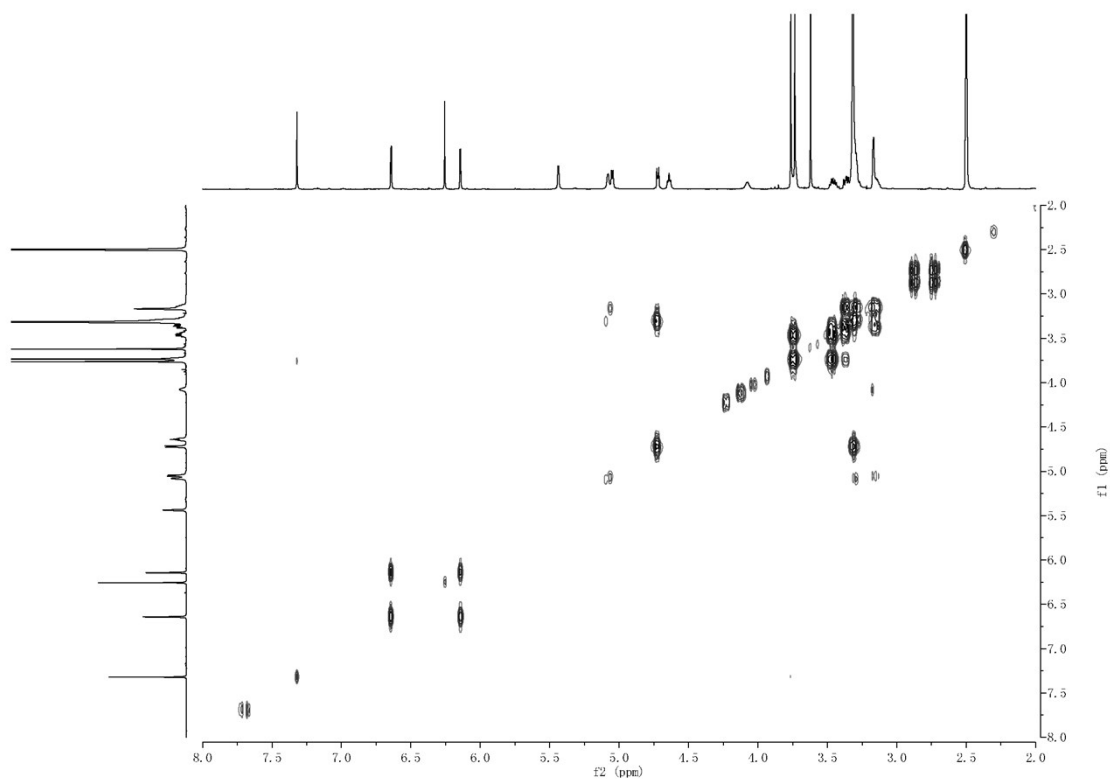

Figure S10. COSY spectrum (500 MHz) of **1** in  $\text{DMSO-}d_6$



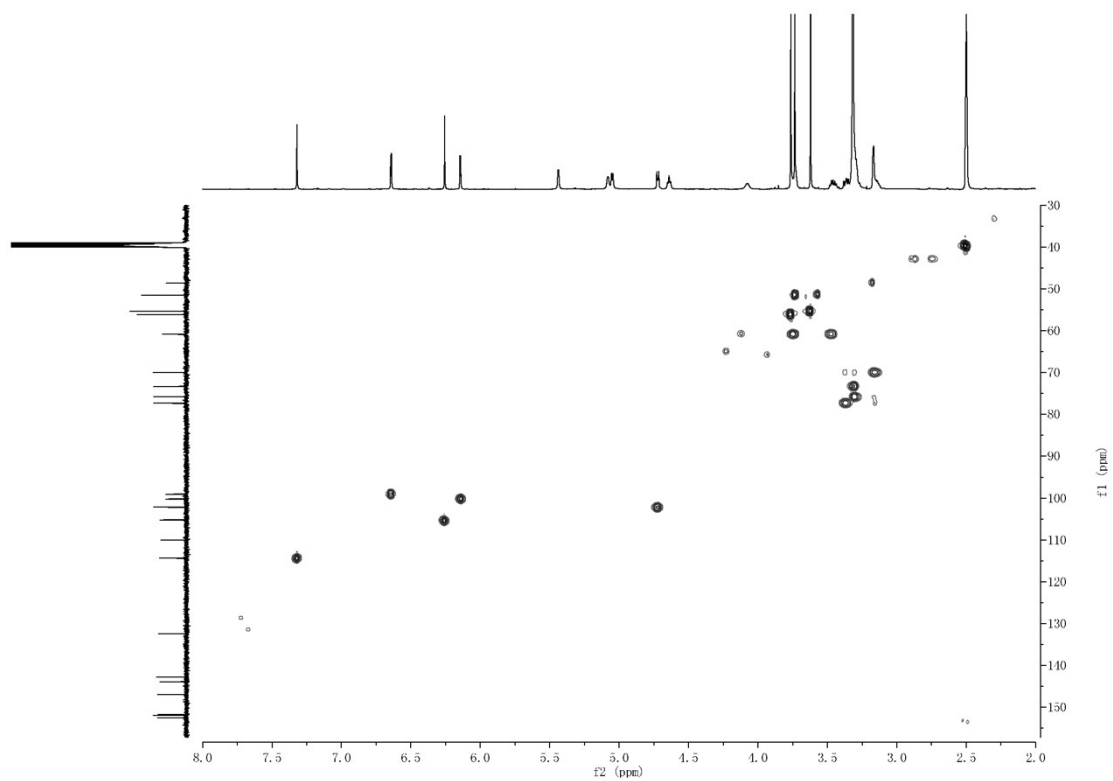

**Figure S11.** HSQC spectrum (500 MHz) of **1** in DMSO- $d_6$

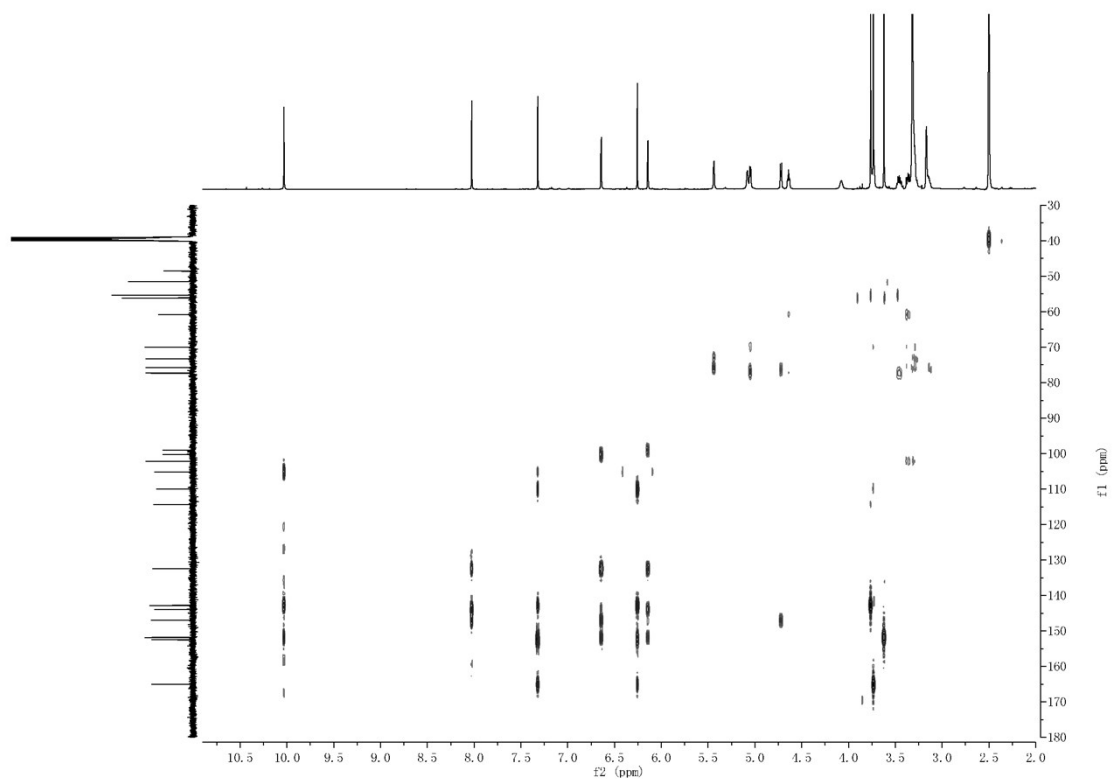

**Figure S12.** HMBC spectrum (500 MHz) of **1** in DMSO- $d_6$

[YXJ]-24g #71-79 RT: 0.96-1.06 AV: 9 NL: 1.64E5  
T: ITMS + c ESIsid=35.00 Full ms [100.00-2000.00]

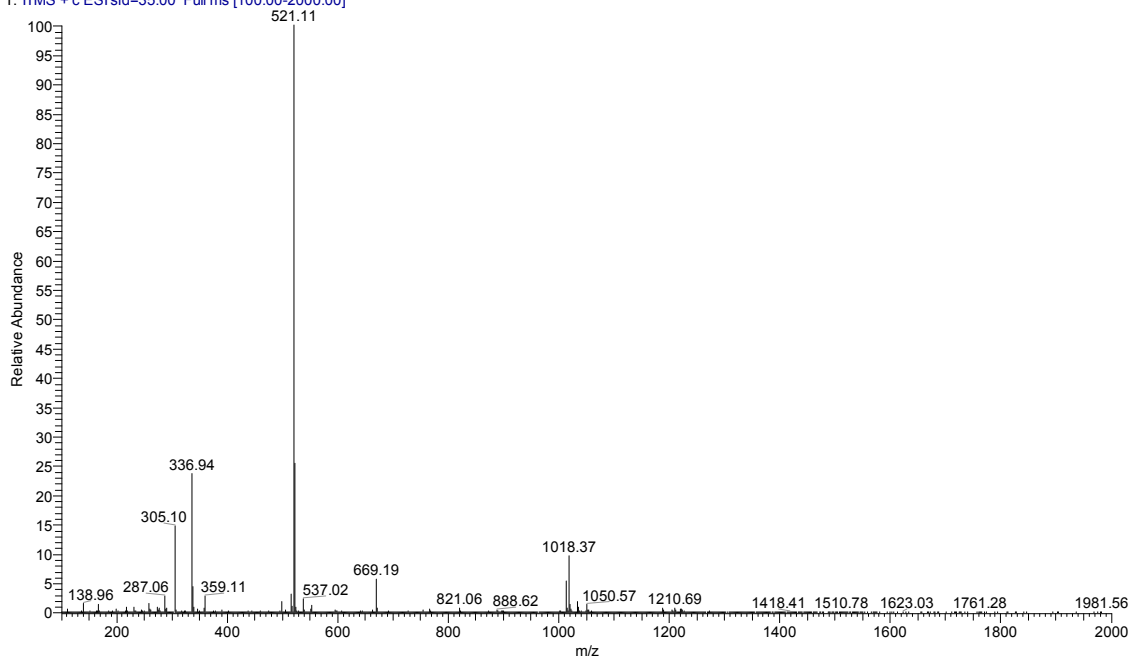

Figure S13. ESIMS spectrum of 1

Acq. File: P-Xiaojian-2.wiff

Sample Name: Sample003  
Sample Number: N/A

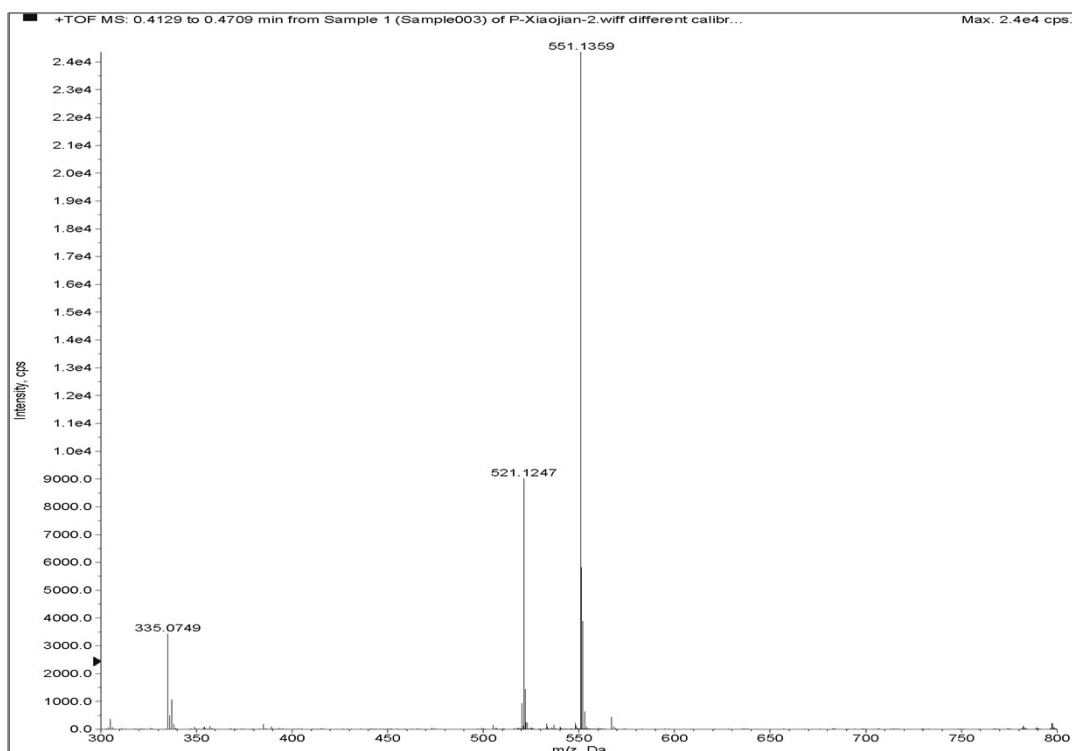

Figure S14. HRESIMS spectrum of 1

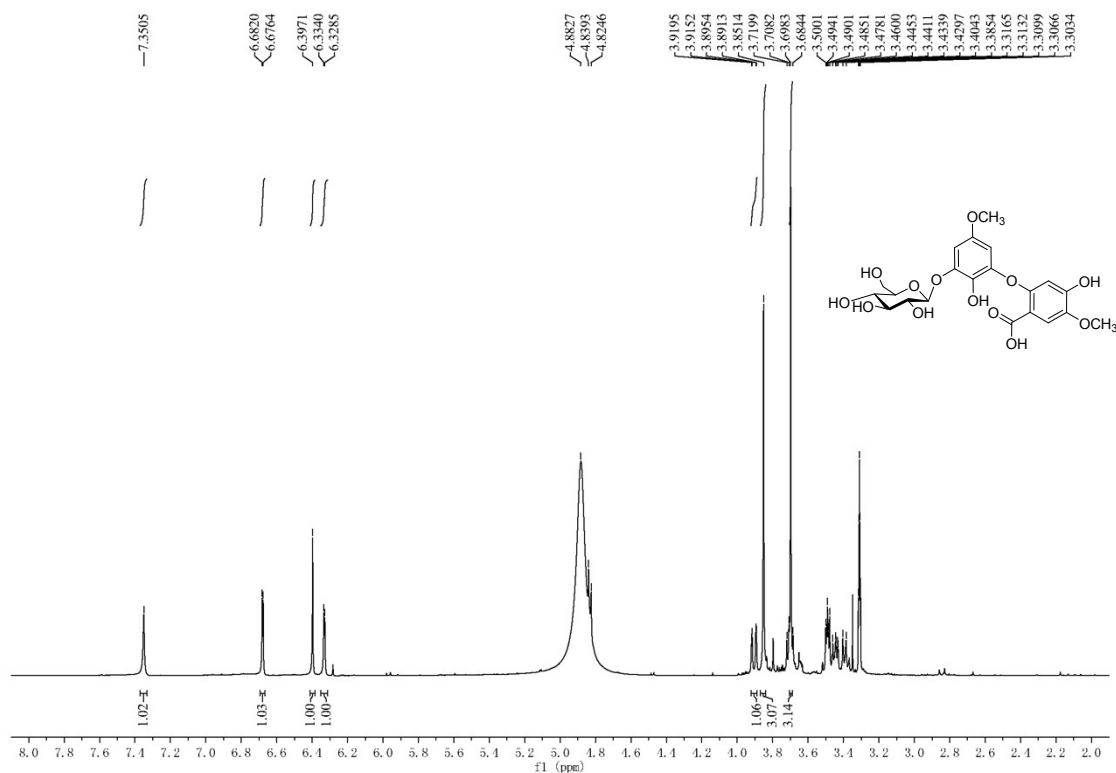

Figure S15.  $^1\text{H}$  NMR spectrum (500 MHz) of **2** in  $\text{CD}_3\text{OD}$

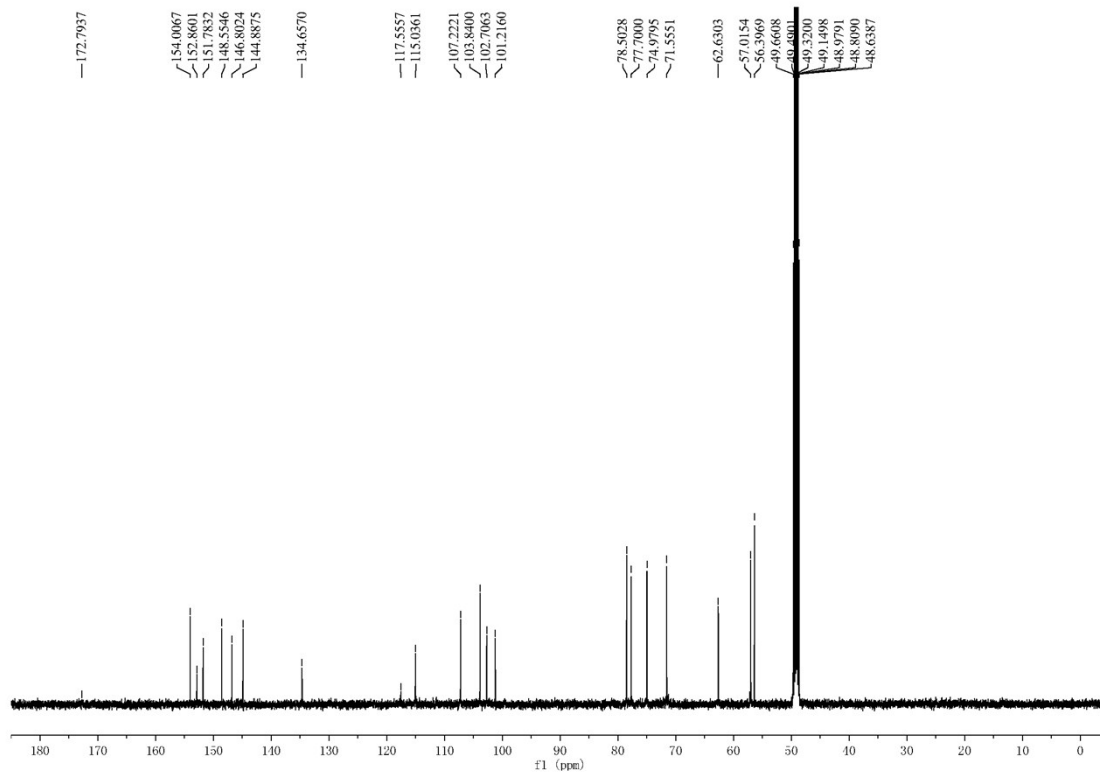

Figure S16.  $^{13}\text{C}$  NMR spectrum (125 MHz) of **2** in  $\text{CD}_3\text{OD}$

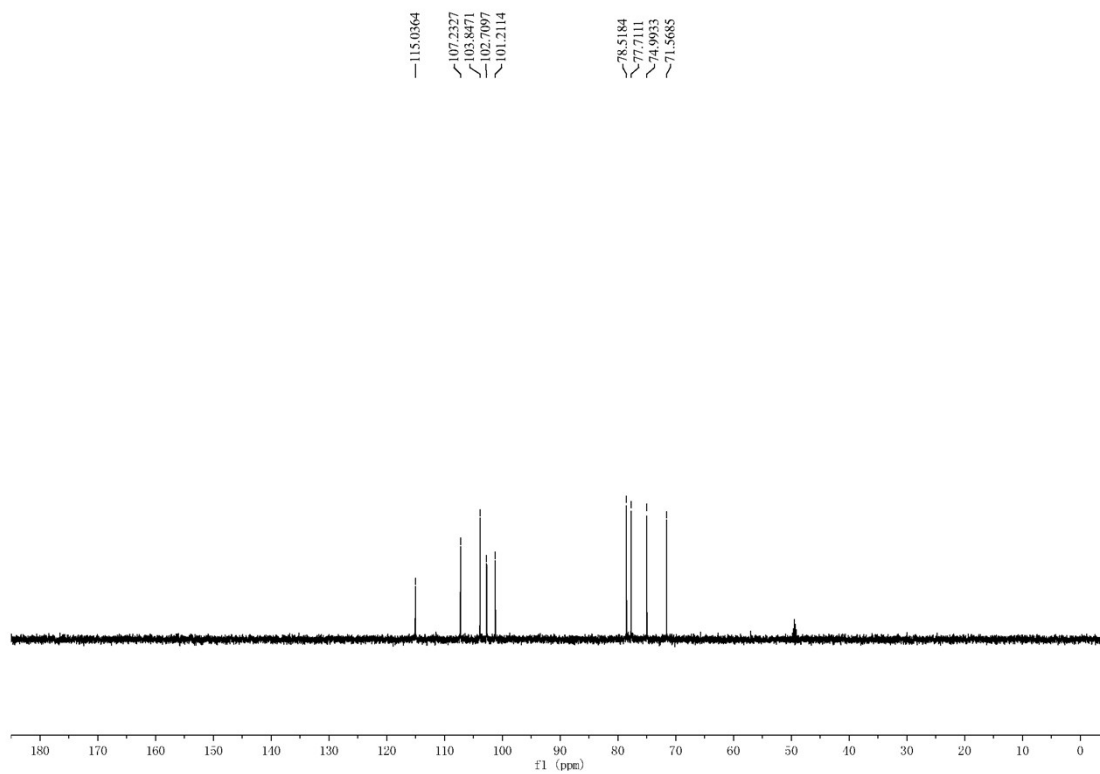

**Figure S17.** DEPT-90 spectrum (125 MHz) of **2** in CD<sub>3</sub>OD

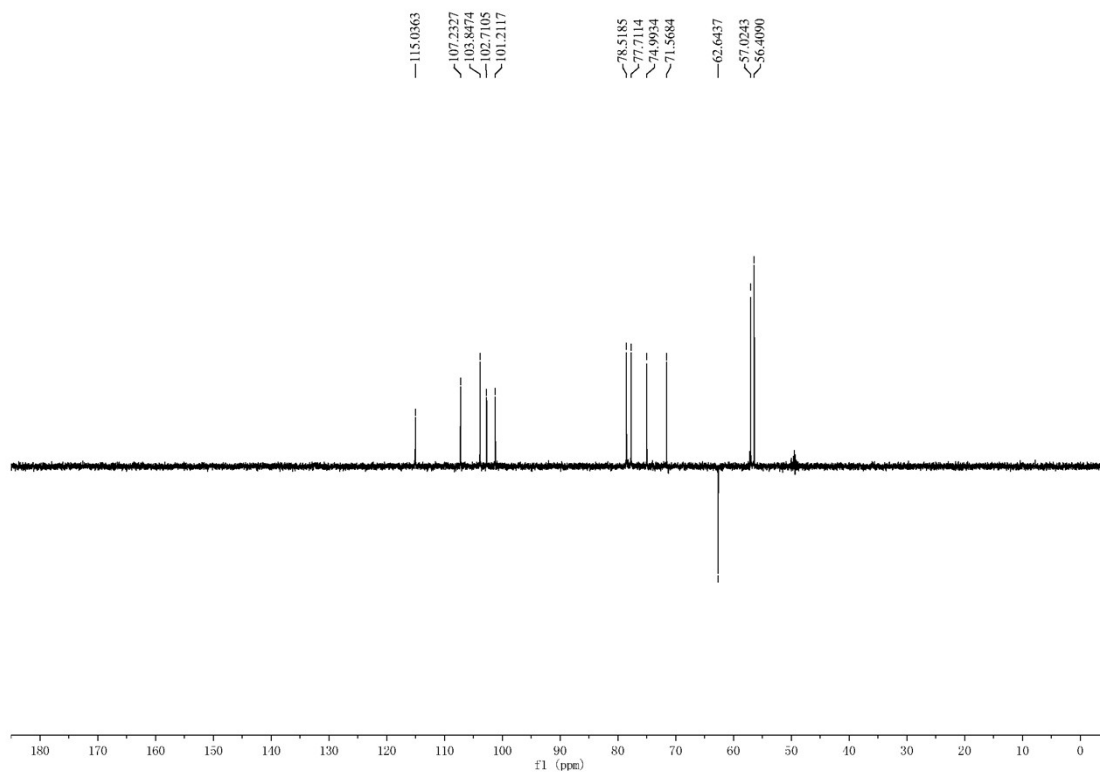

**Figure S18.** DEPT-135 spectrum (125 MHz) of **2** in CD<sub>3</sub>OD

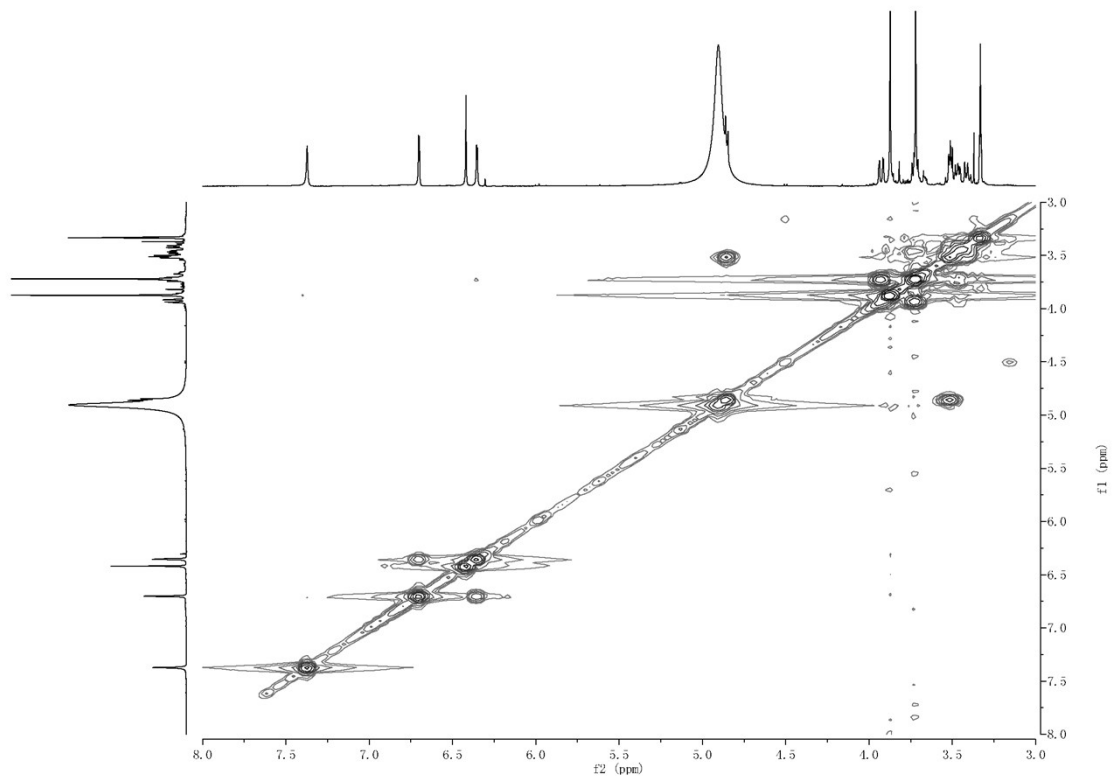

**Figure S19.** COSY spectrum (500 MHz) of **2** in CD<sub>3</sub>OD

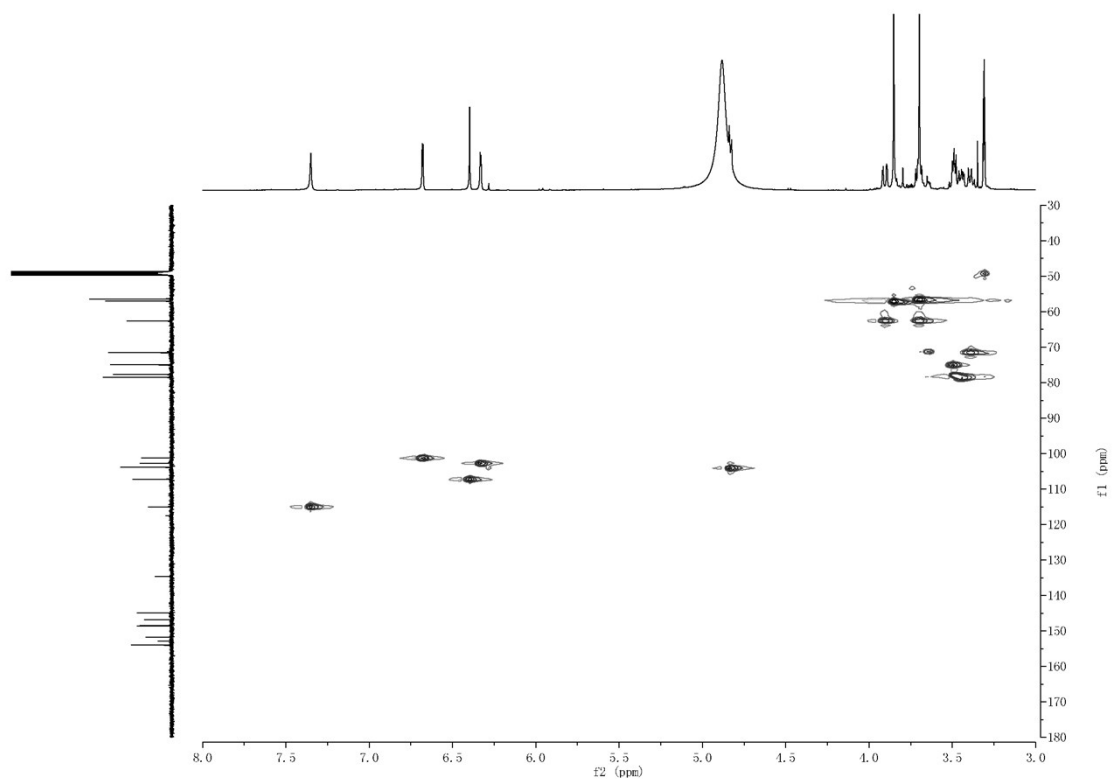

**Figure S20.** HSQC spectrum (500 MHz) of **2** in CD<sub>3</sub>OD

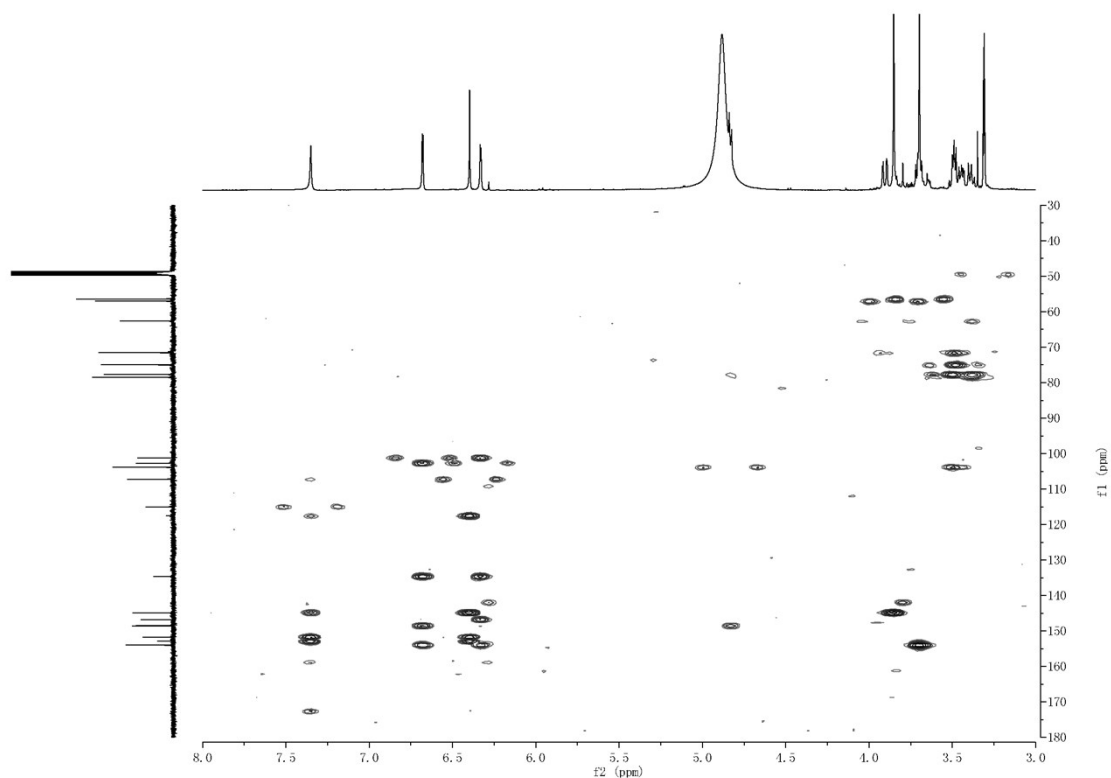

**Figure S21.** HMBC spectrum (500 MHz) of **2** in CD<sub>3</sub>OD

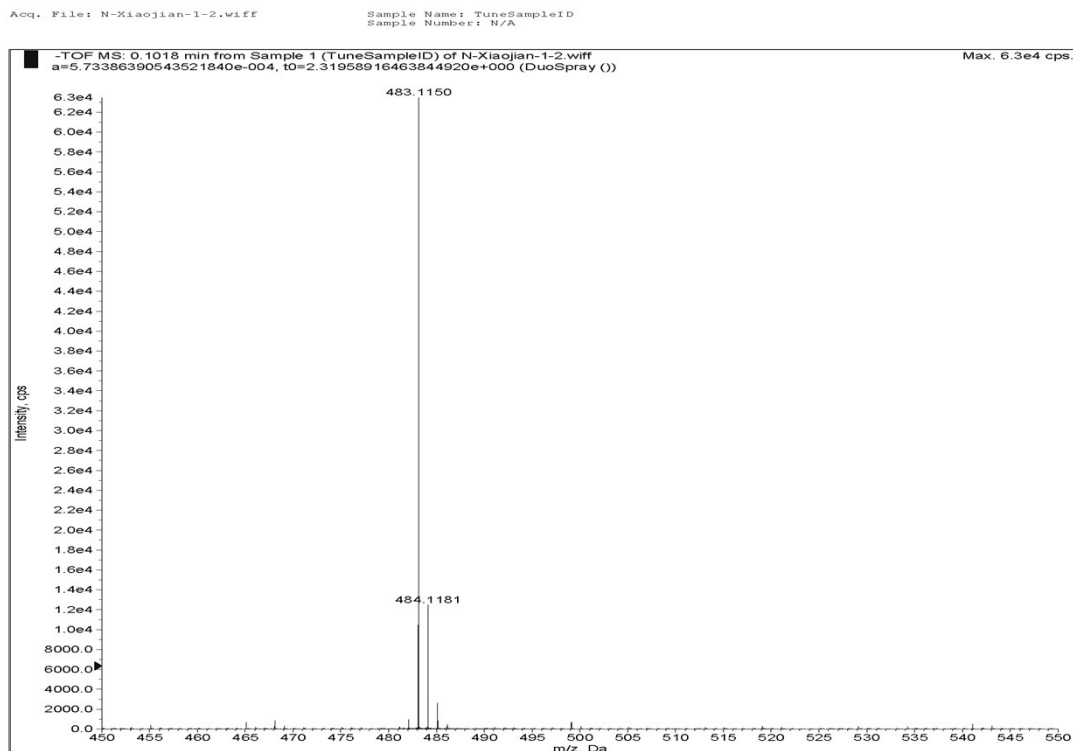

**Figure S22.** HRESIMS spectrum of **2**

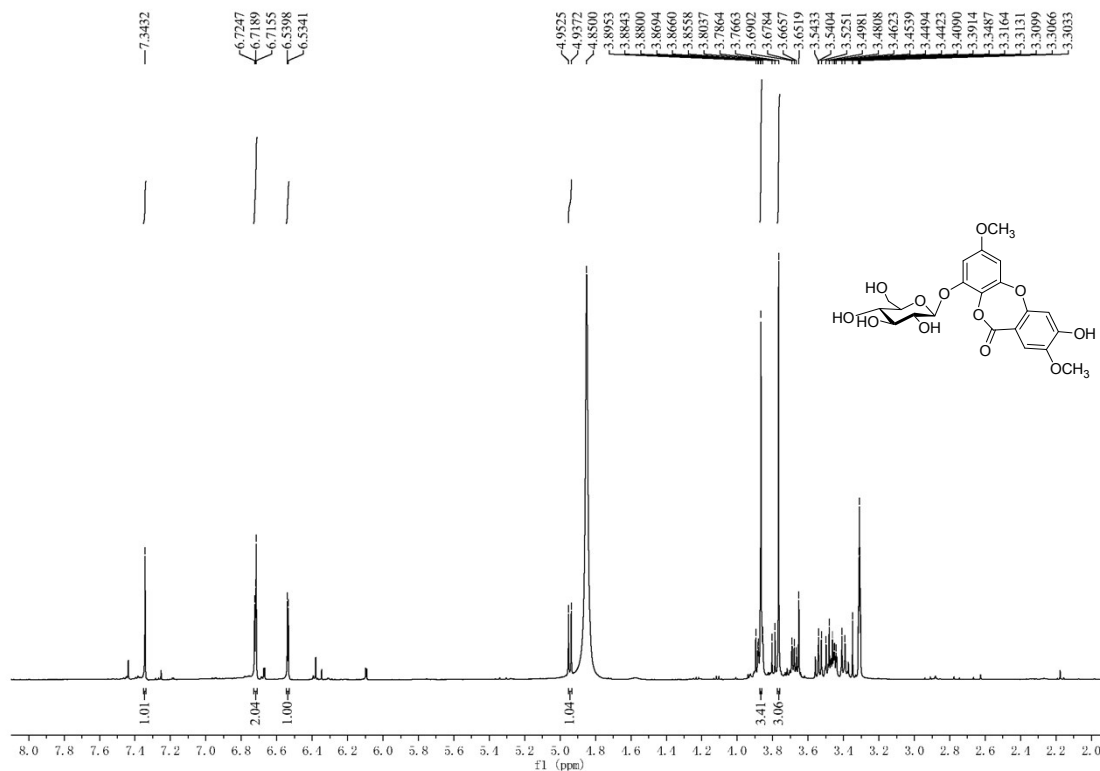

Figure S23.  $^1\text{H}$  NMR spectrum (500 MHz) of **3** in  $\text{CD}_3\text{OD}$

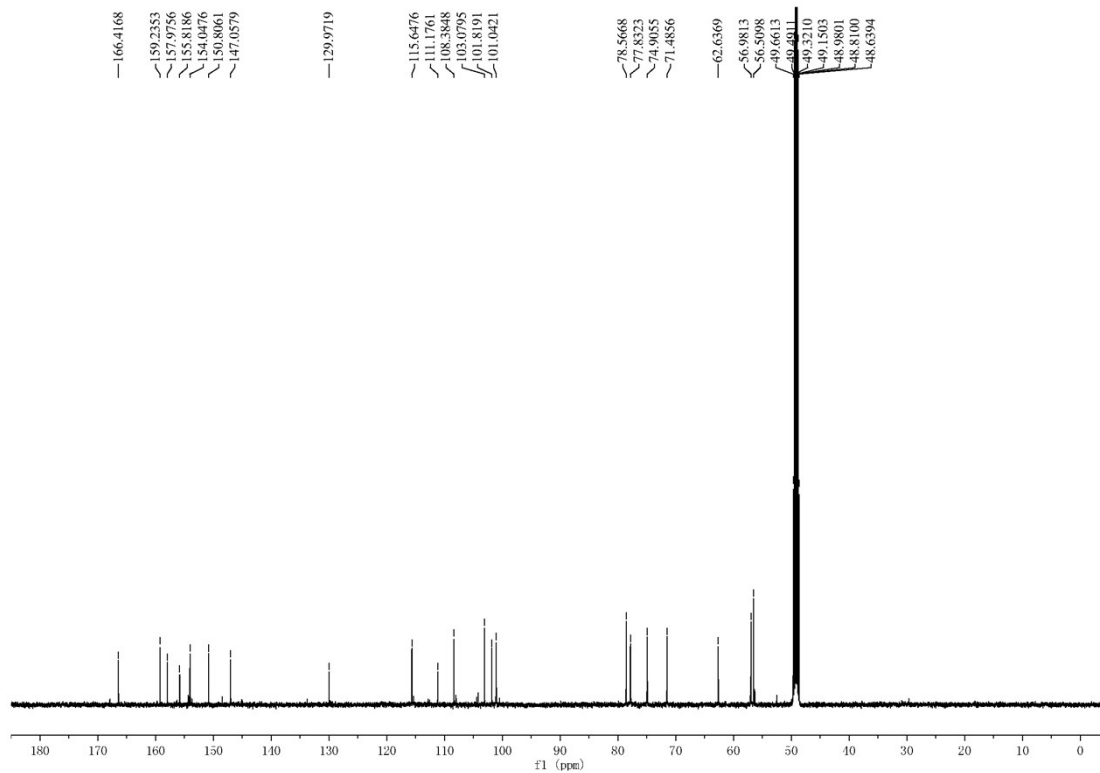

Figure S24.  $^{13}\text{C}$  NMR spectrum (125 MHz) of **3** in  $\text{CD}_3\text{OD}$

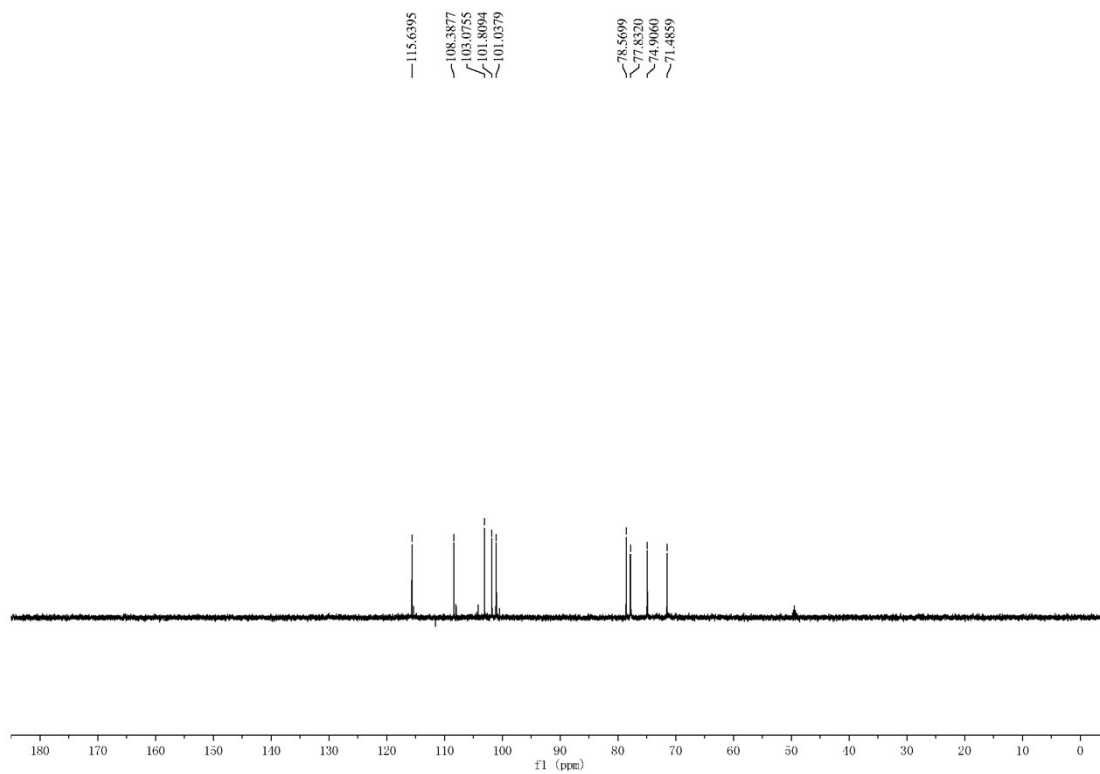

**Figure S25.** DEPT-90 spectrum (125 MHz) of **3** in CD<sub>3</sub>OD

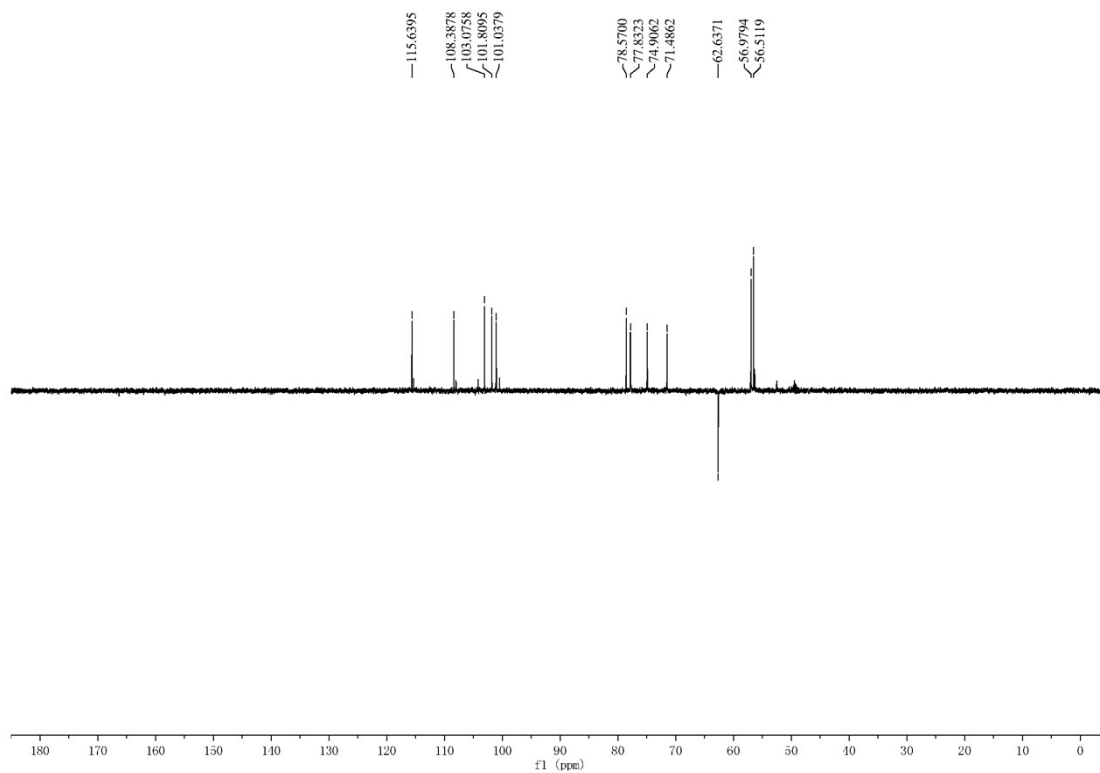

**Figure S26.** DEPT-135 spectrum (125 MHz) of **3** in CD<sub>3</sub>OD



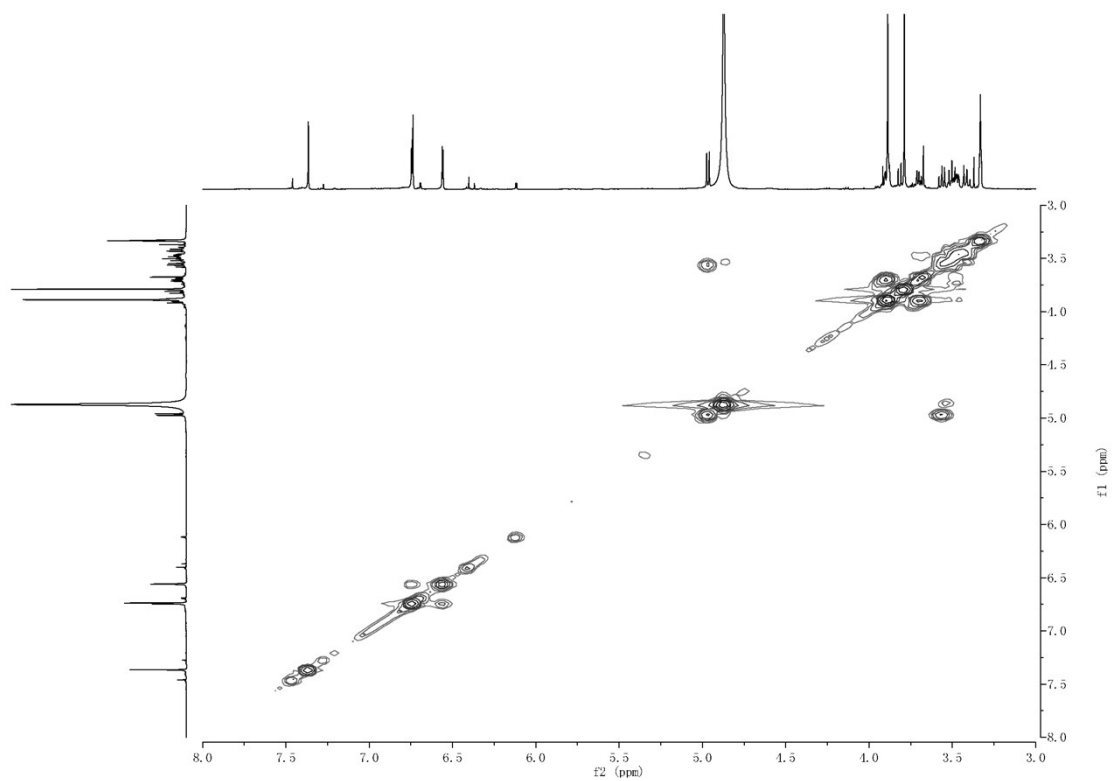

**Figure S27.** COSY spectrum (500 MHz) of **3** in CD<sub>3</sub>OD

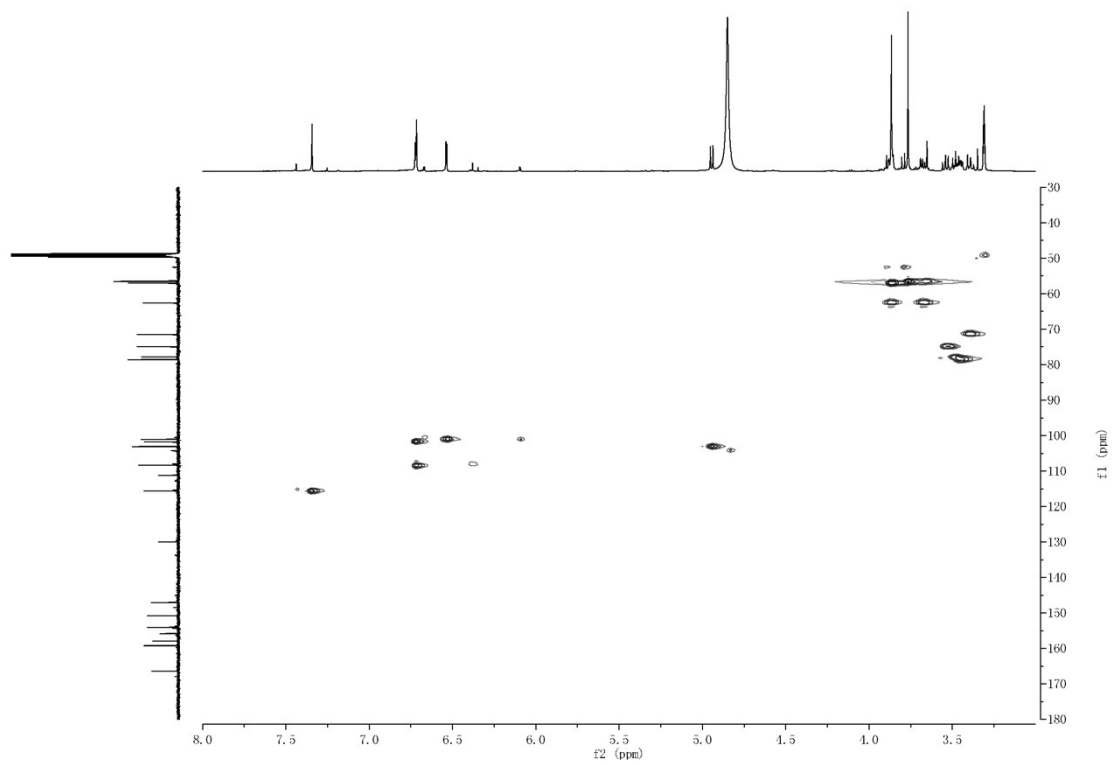

**Figure S28.** HSQC spectrum (500 MHz) of **3** in CD<sub>3</sub>OD

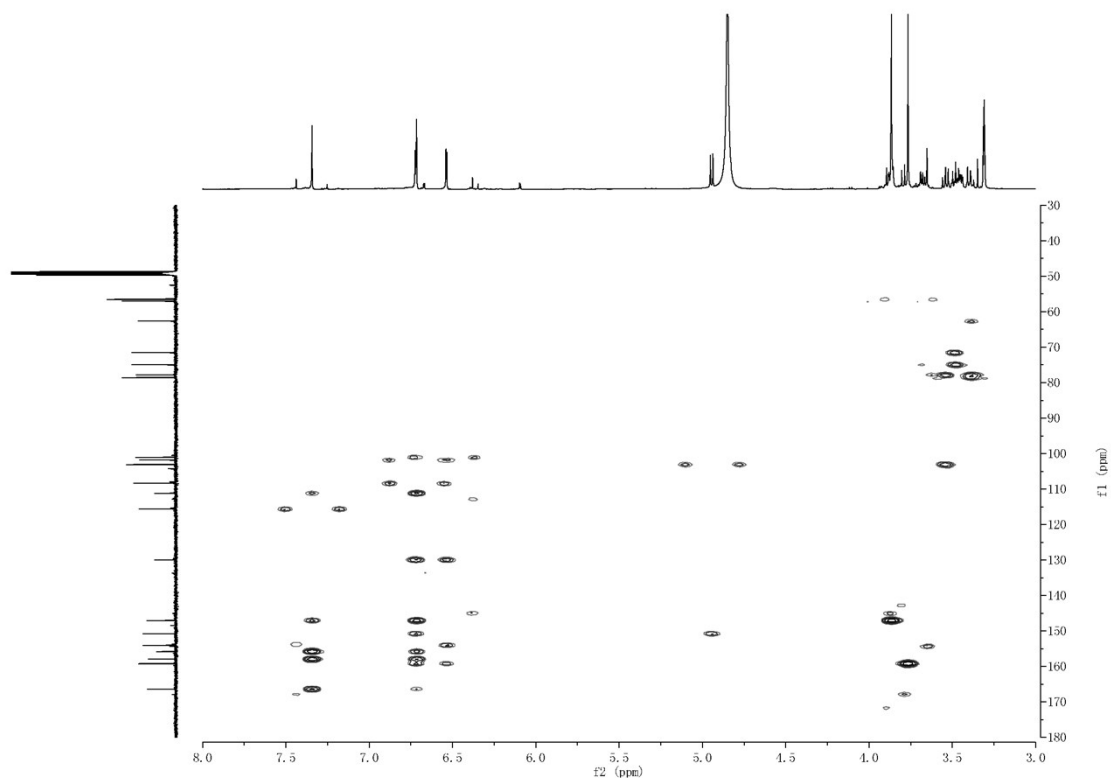

**Figure S29.** HMBC spectrum (500 MHz) of **3** in CD<sub>3</sub>OD

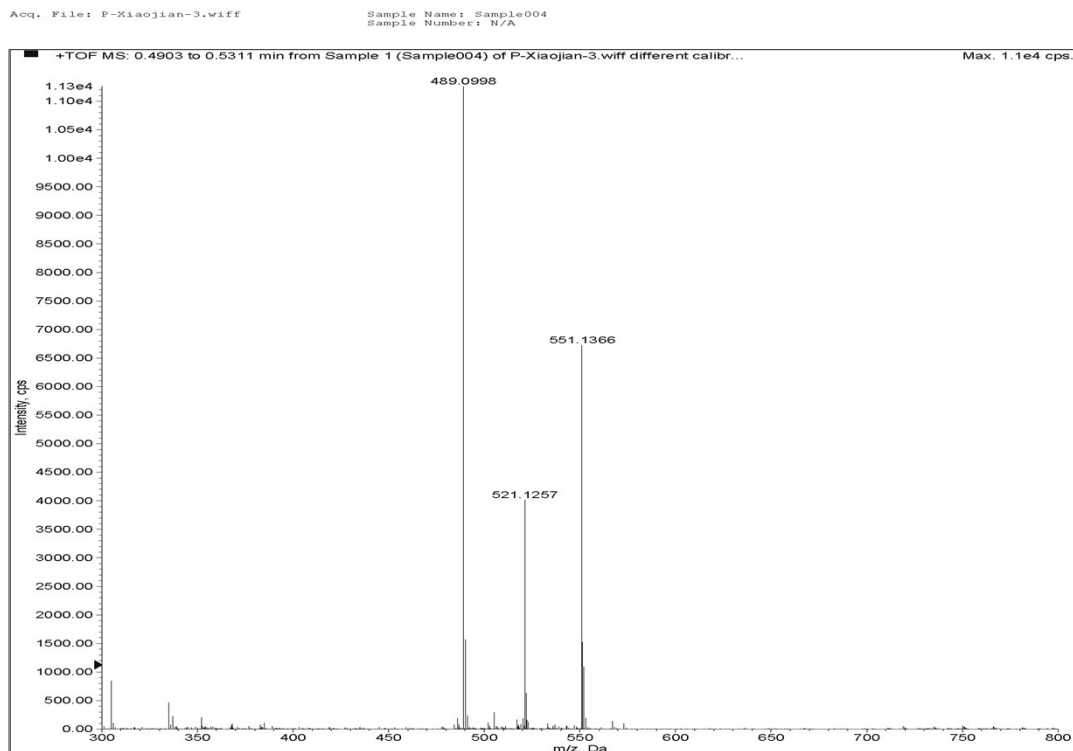

**Figure S30.** HRMSIMS spectrum of **3**

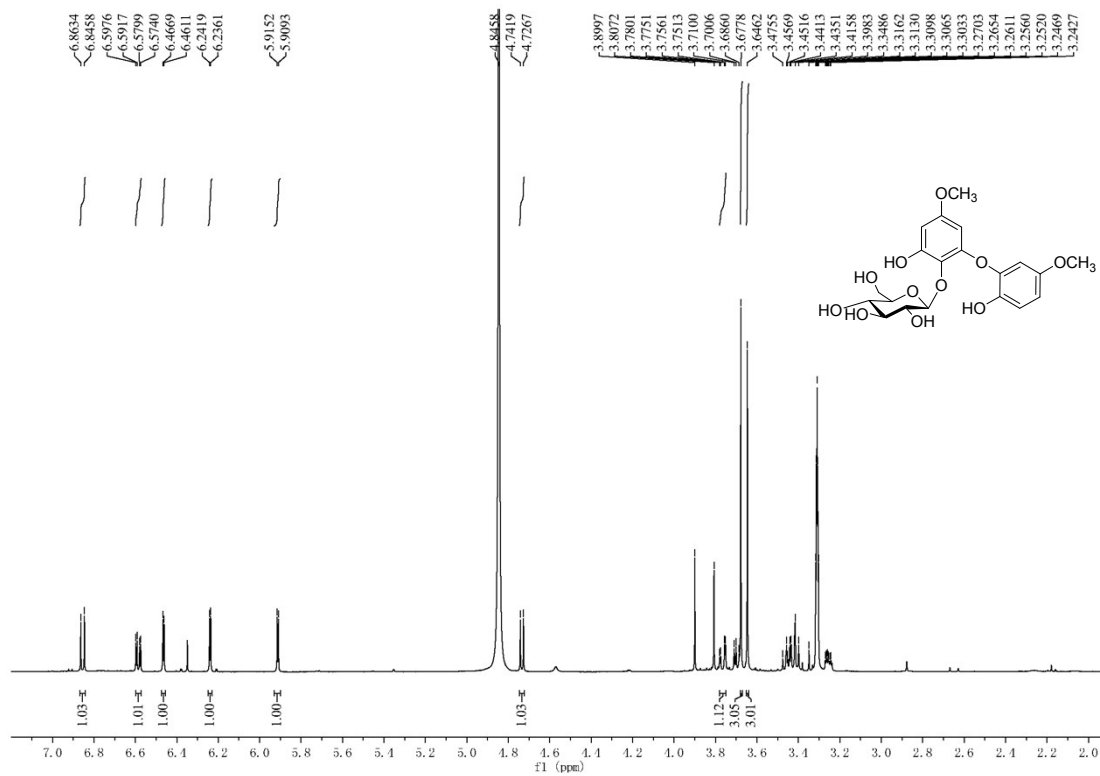

Figure S31.  $^1\text{H}$  NMR spectrum (500 MHz) of 4 in  $\text{CD}_3\text{OD}$

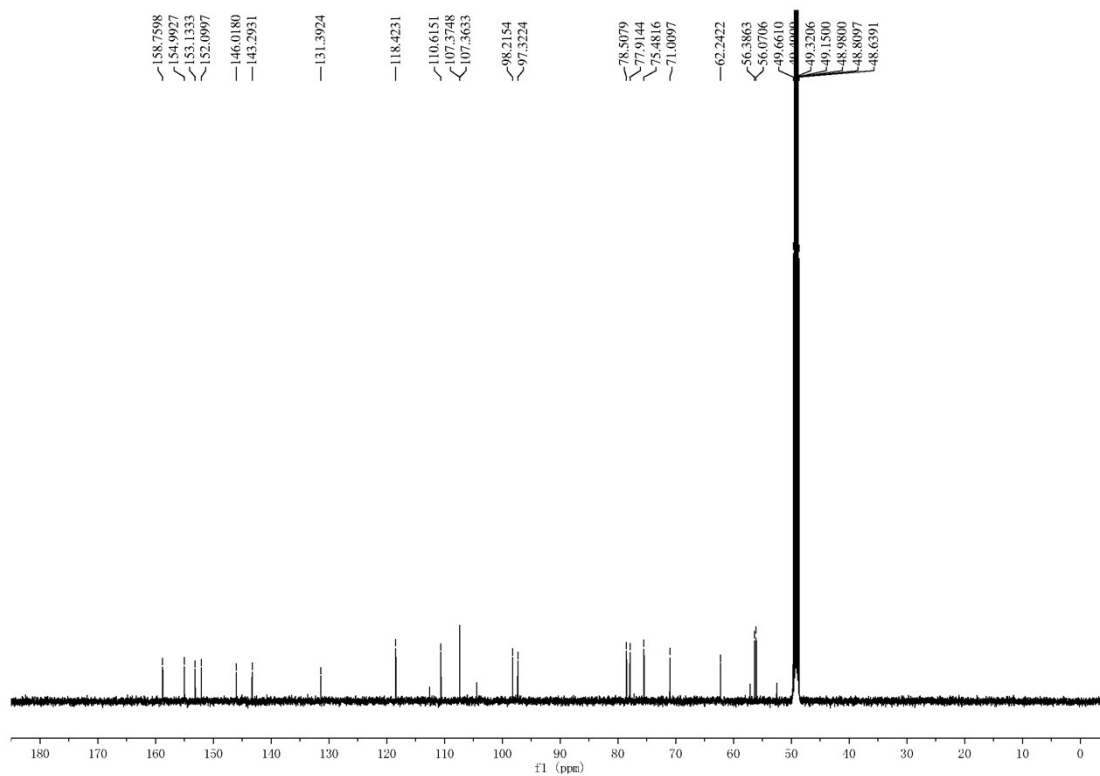

Figure S32.  $^{13}\text{C}$  NMR spectrum (125 MHz) of 4 in  $\text{CD}_3\text{OD}$

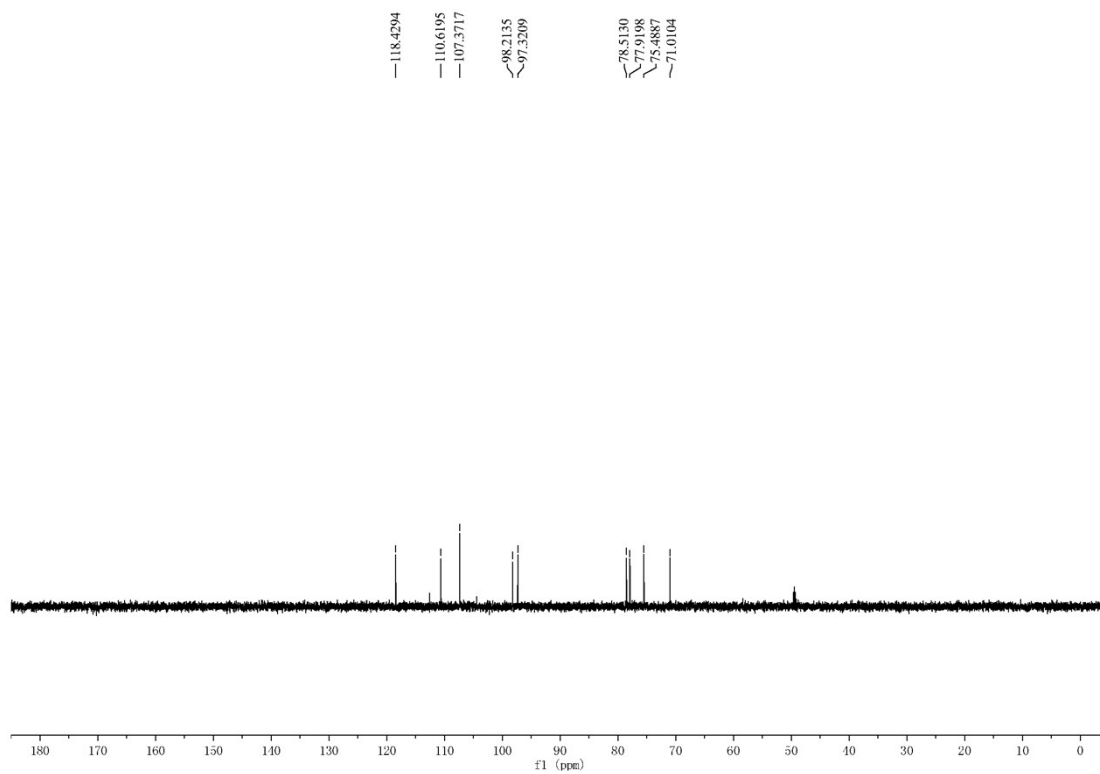

**Figure S33.** DEPT-90 spectrum (125 MHz) of **4** in CD<sub>3</sub>OD

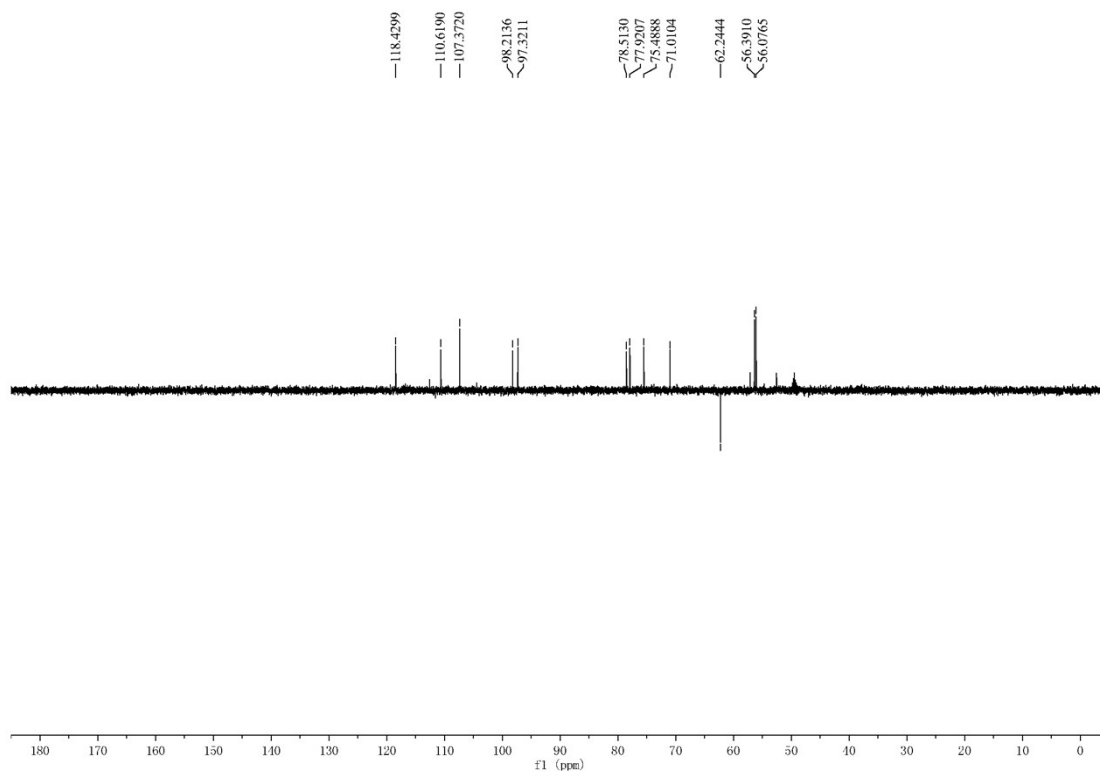

**Figure S34.** DEPT-135 spectrum (125 MHz) of **4** in CD<sub>3</sub>OD

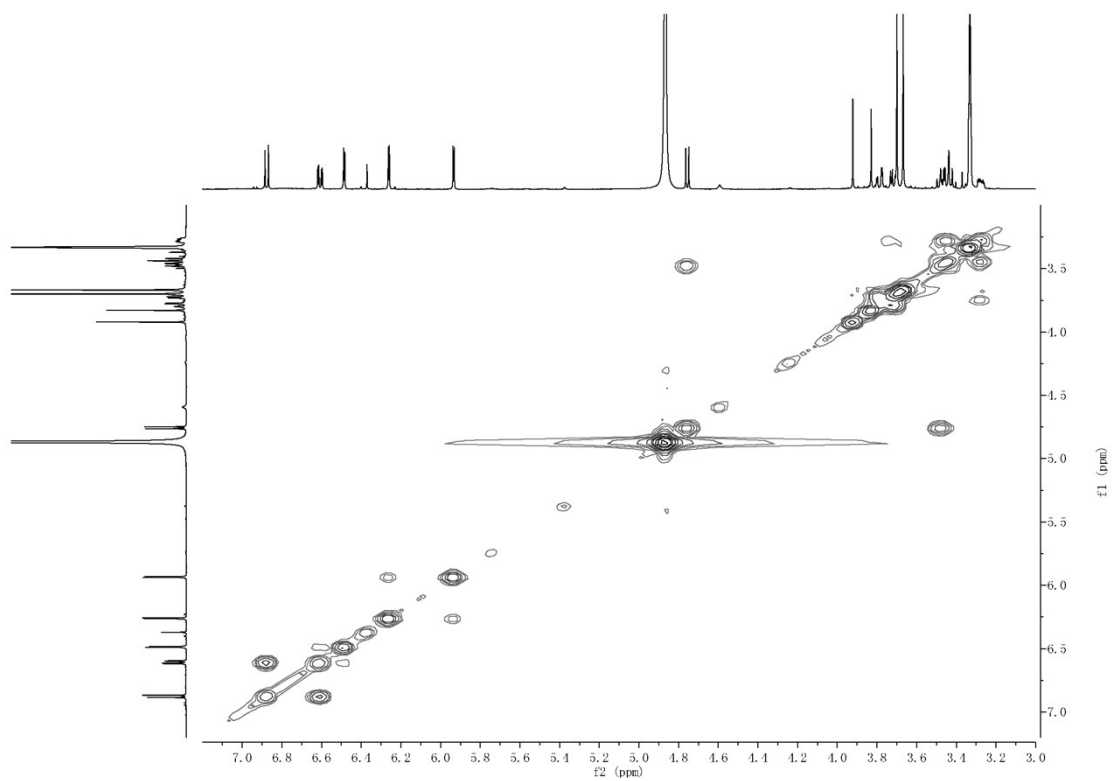

**Figure S35.** COSY spectrum (500 MHz) of **4** in CD<sub>3</sub>OD

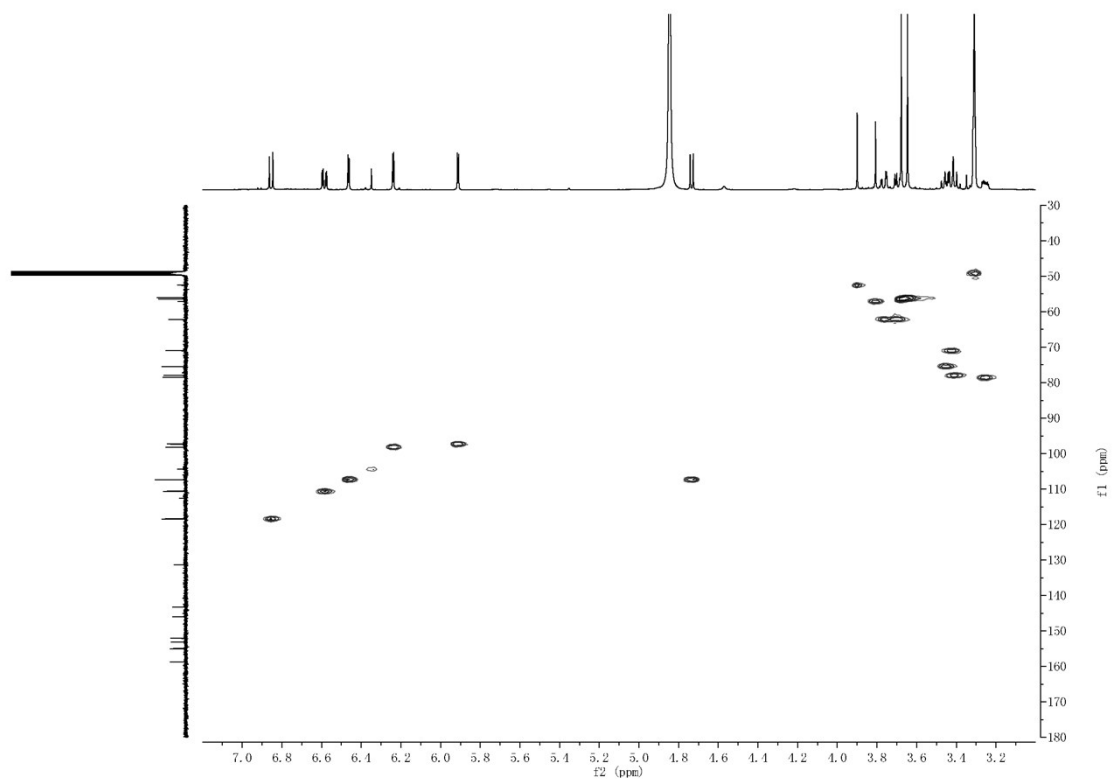

**Figure S36.** HSQC spectrum (500 MHz) of **4** in CD<sub>3</sub>OD

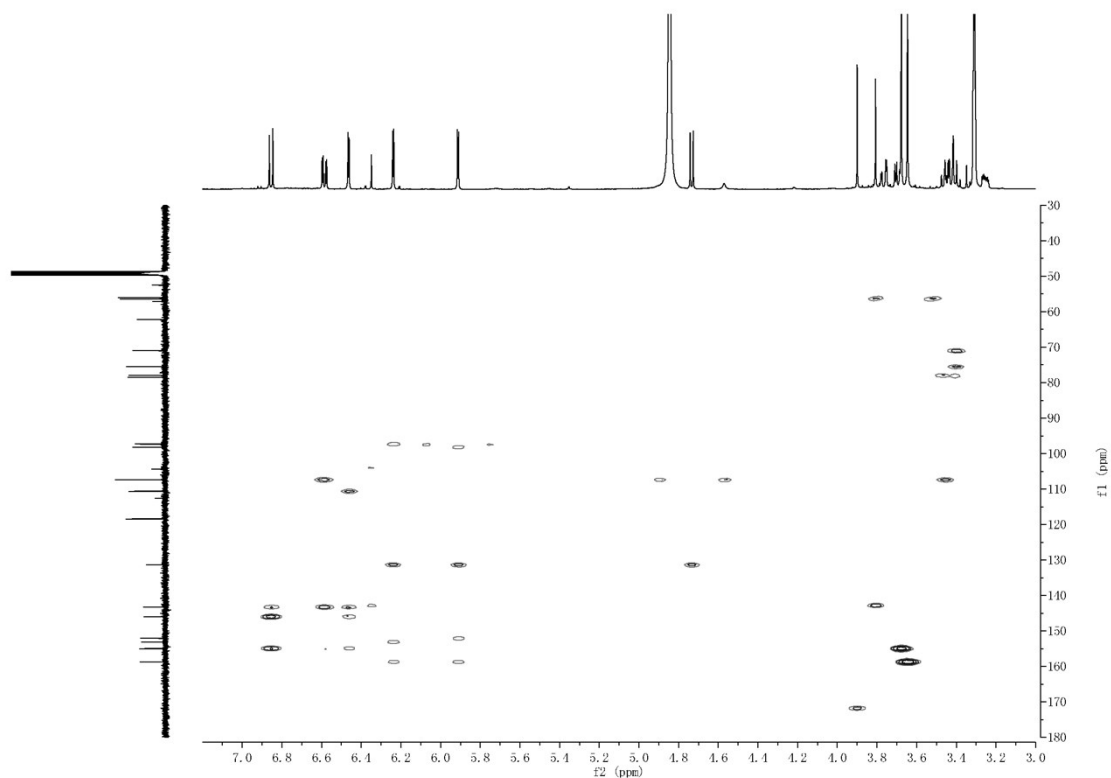

Figure S37. HMBC spectrum (500 MHz) of **4** in CD<sub>3</sub>OD

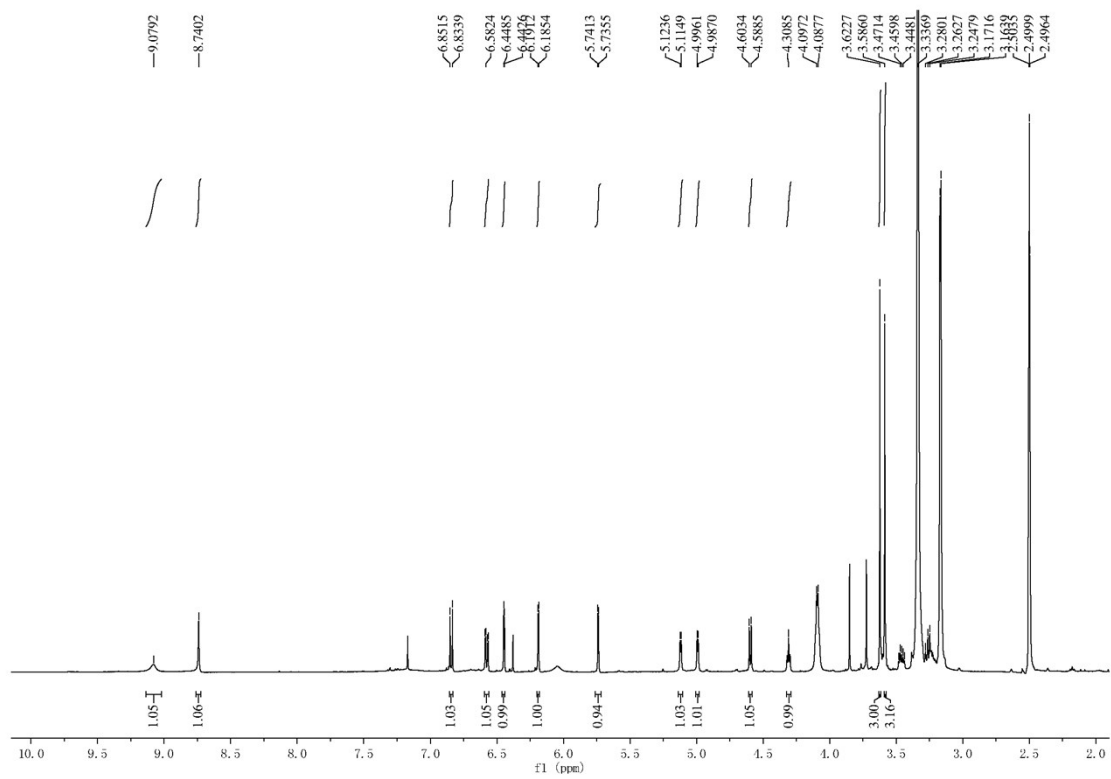

Figure S38. <sup>1</sup>H NMR spectrum (500 MHz) of **4** in DMSO-*d*<sub>6</sub>

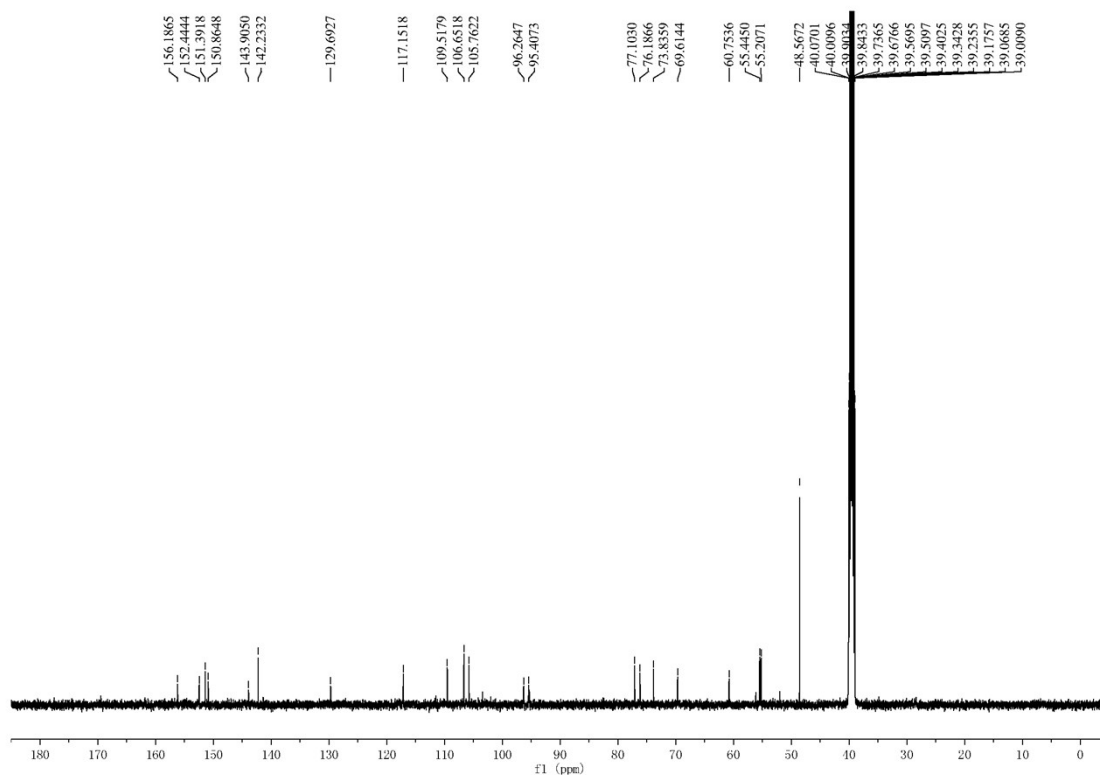

Figure S39.  $^{13}\text{C}$  NMR spectrum (125 MHz) of **4** in  $\text{DMSO-}d_6$

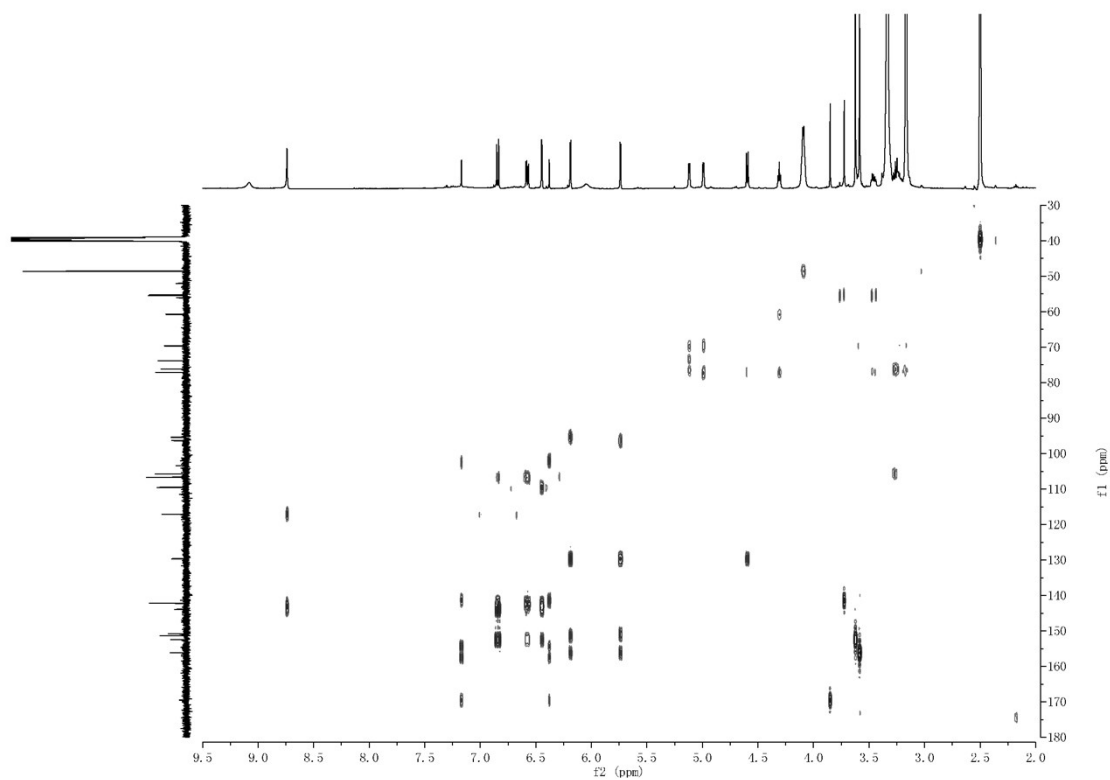

Figure S40. HMBC spectrum (500 MHz) of **4** in  $\text{DMSO-}d_6$

[YX]-24D #75-84 RT: 1.08-1.19 AV: 10 NL: 1.31E4  
T: ITMS + c ESIsid=35.00 Full ms [100.00-2000.00]

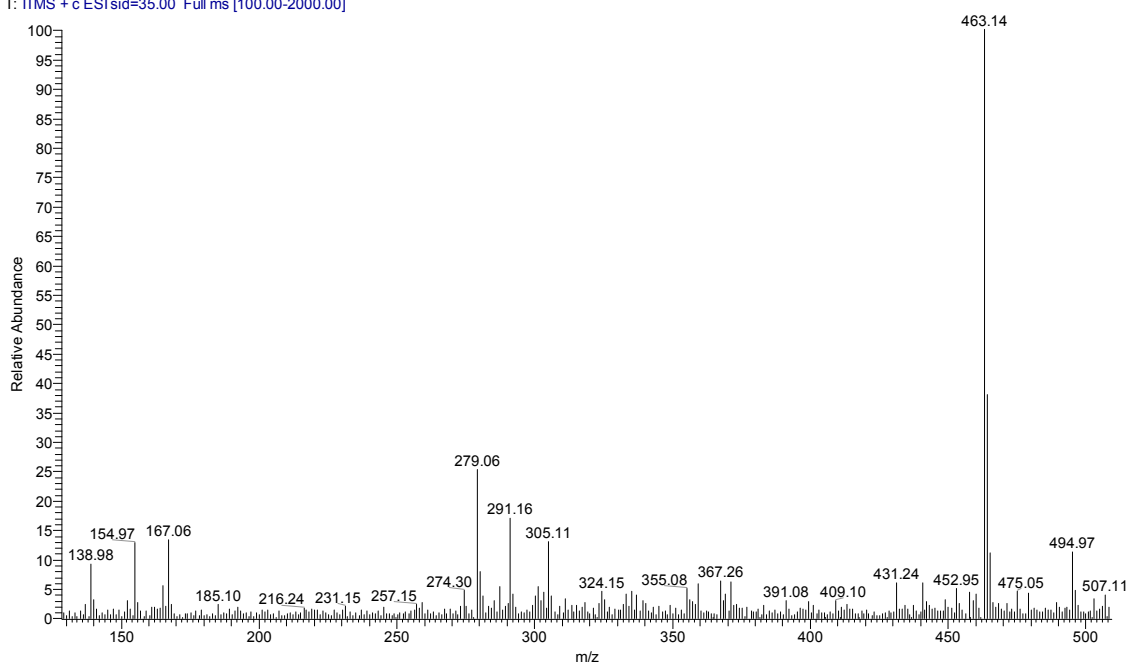

Figure S41. ESIMS spectrum of 4

Acq. File: P-Xiaojian-4.wiff

Sample Name: Sample005  
Sample Number: N/A

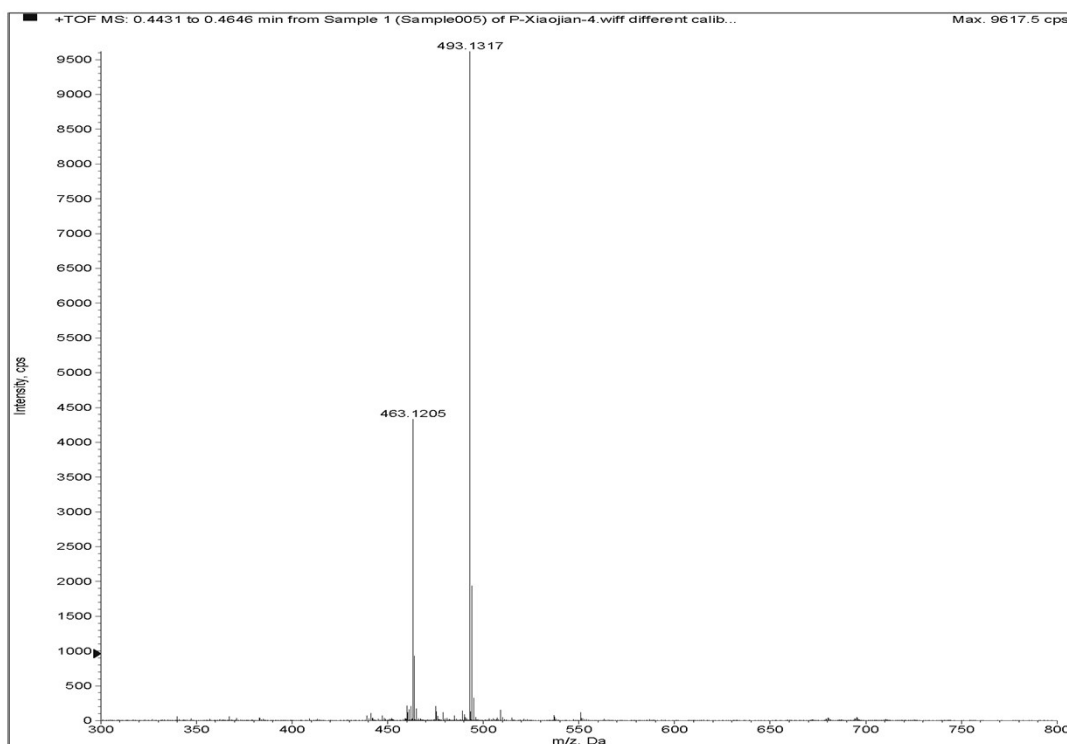

Figure S42. HRMSIMS spectrum of 4



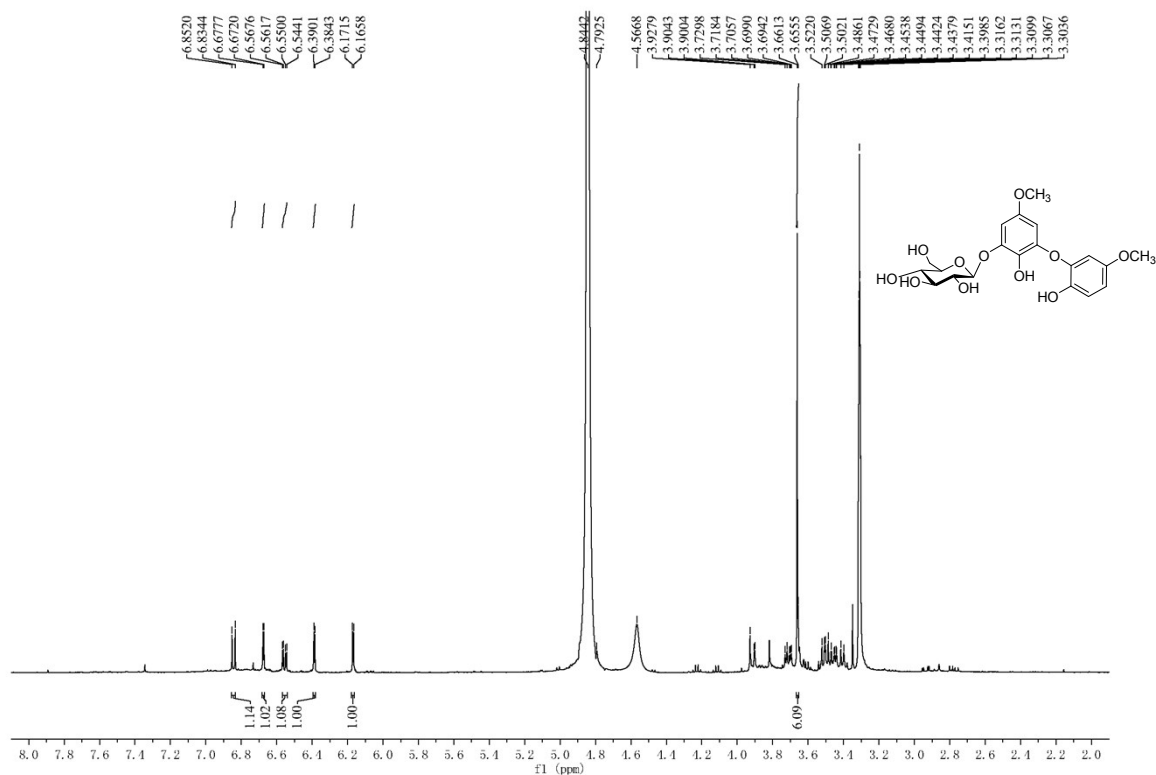

Figure S43.  $^1\text{H}$  NMR spectrum (500 MHz) of **5** in  $\text{CD}_3\text{OD}$

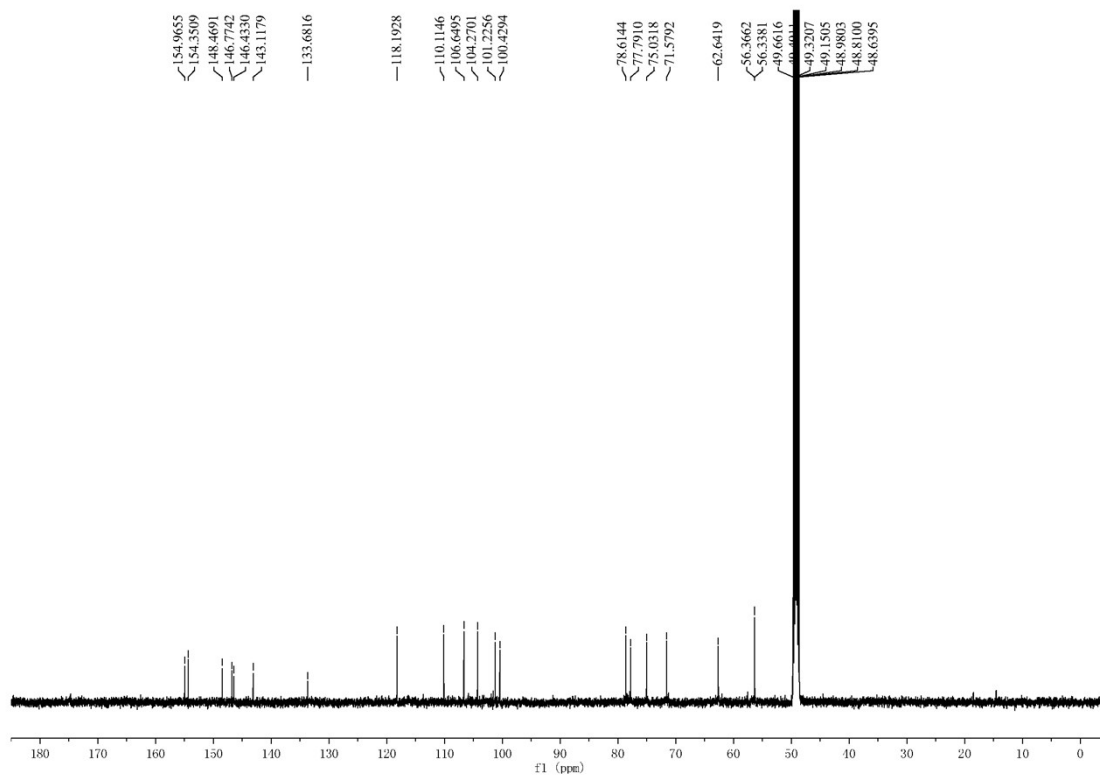

Figure S44.  $^{13}\text{C}$  NMR spectrum (125 MHz) of **5** in  $\text{CD}_3\text{OD}$

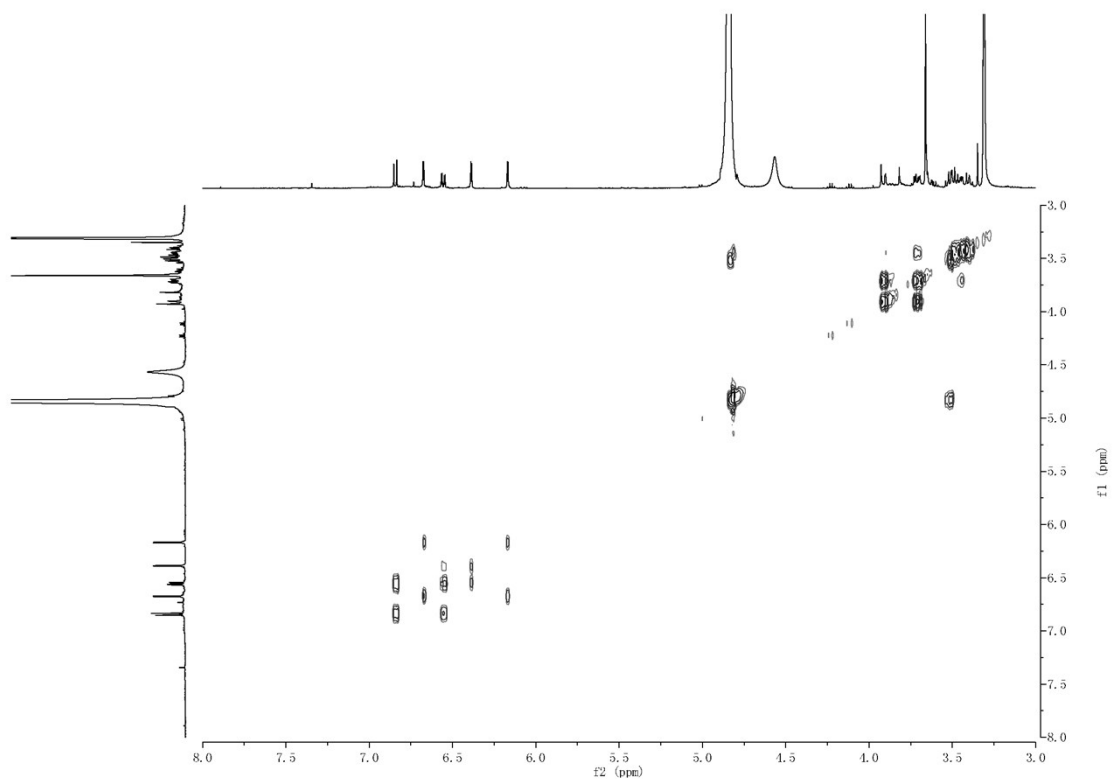

**Figure S45.** COSY spectrum (500 MHz) of **5** in CD<sub>3</sub>OD

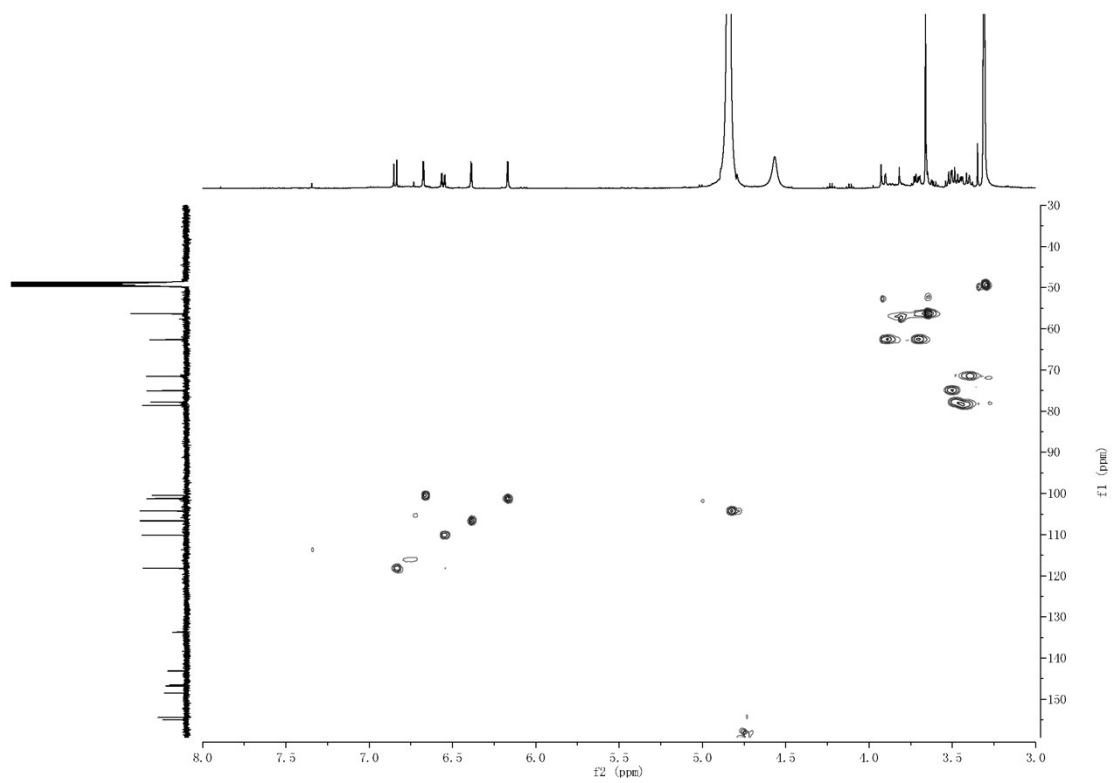

**Figure S46.** HSQC spectrum (500 MHz) of **5** in CD<sub>3</sub>OD

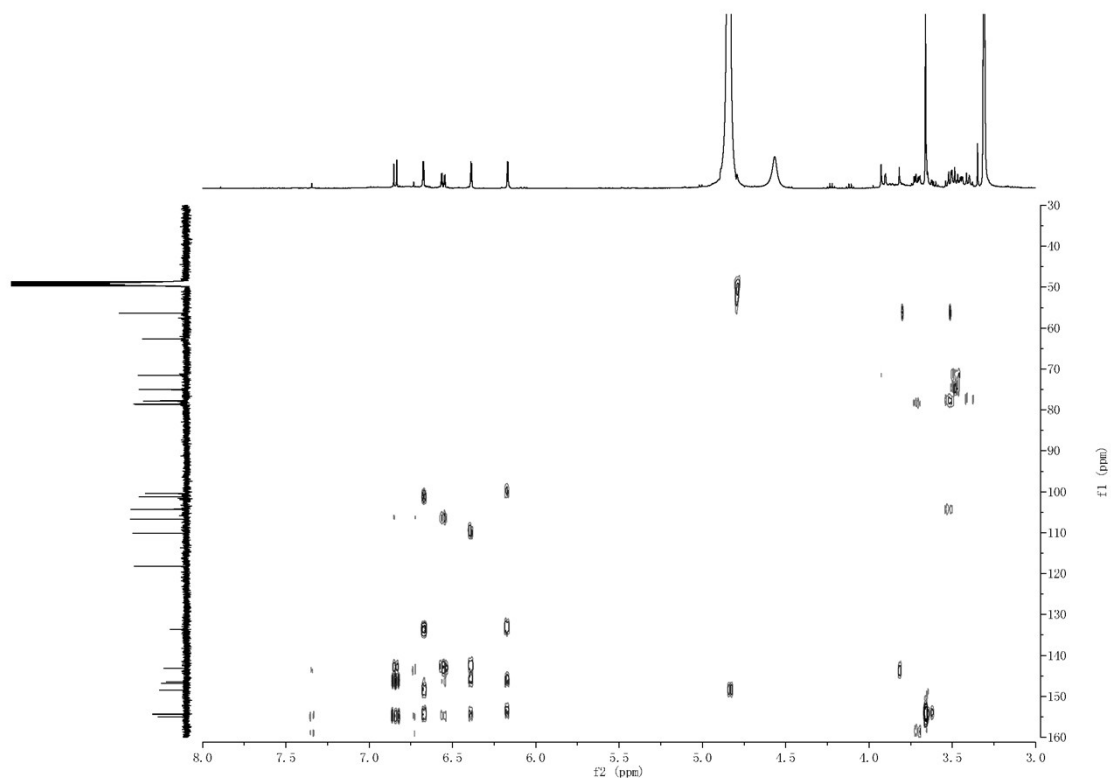

**Figure S47.** HMBC spectrum (500 MHz) of **5** in CD<sub>3</sub>OD

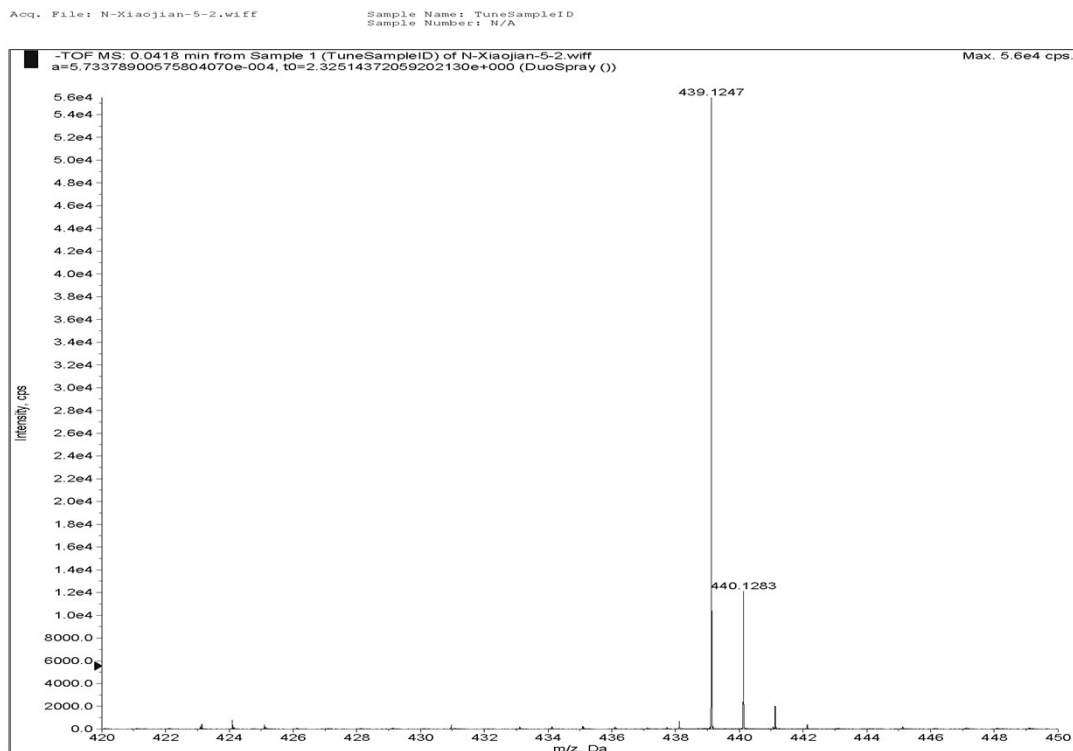

**Figure S48.** HRMSIMS spectrum of **5**

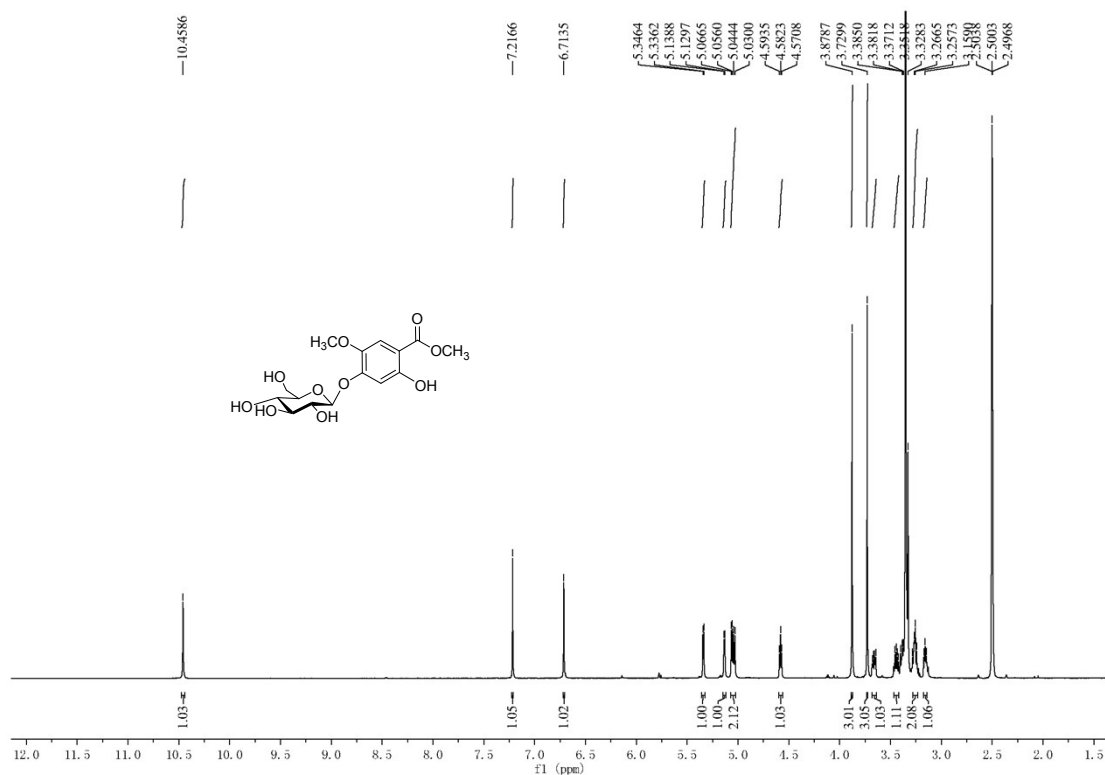

Figure S49. <sup>1</sup>H NMR spectrum (500 MHz) of 6 in DMSO-*d*<sub>6</sub>

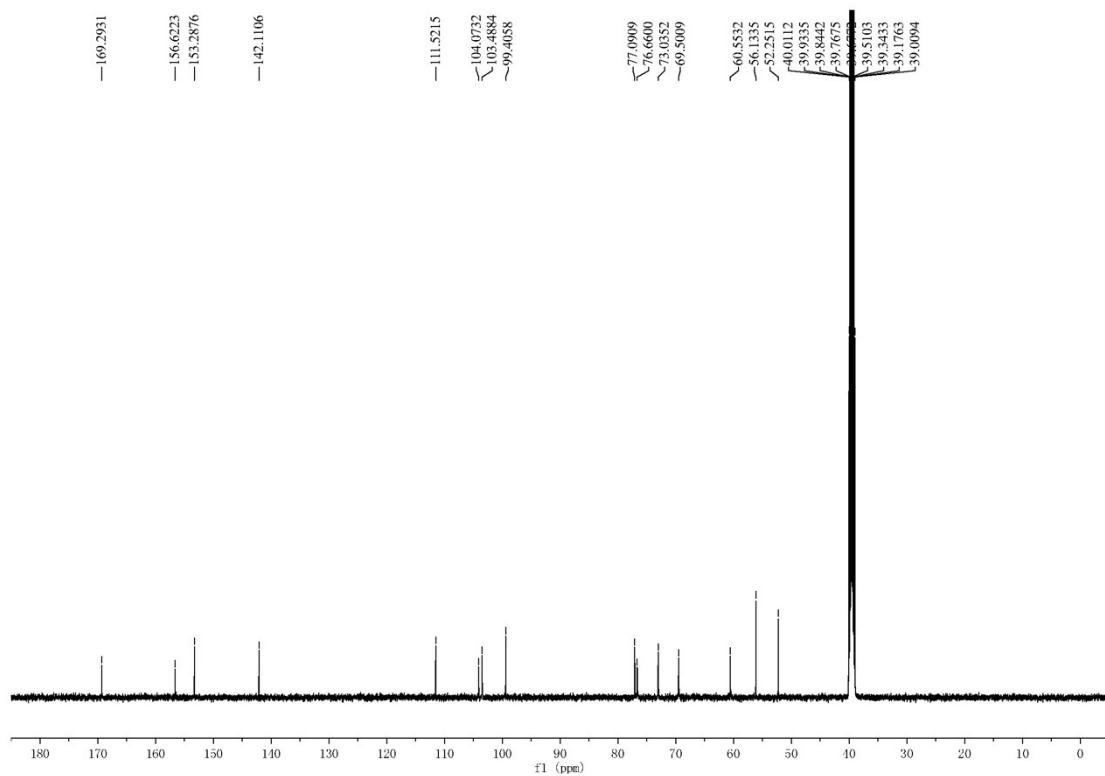

Figure S50. <sup>13</sup>C NMR spectrum (125 MHz) of 6 in DMSO-*d*<sub>6</sub>

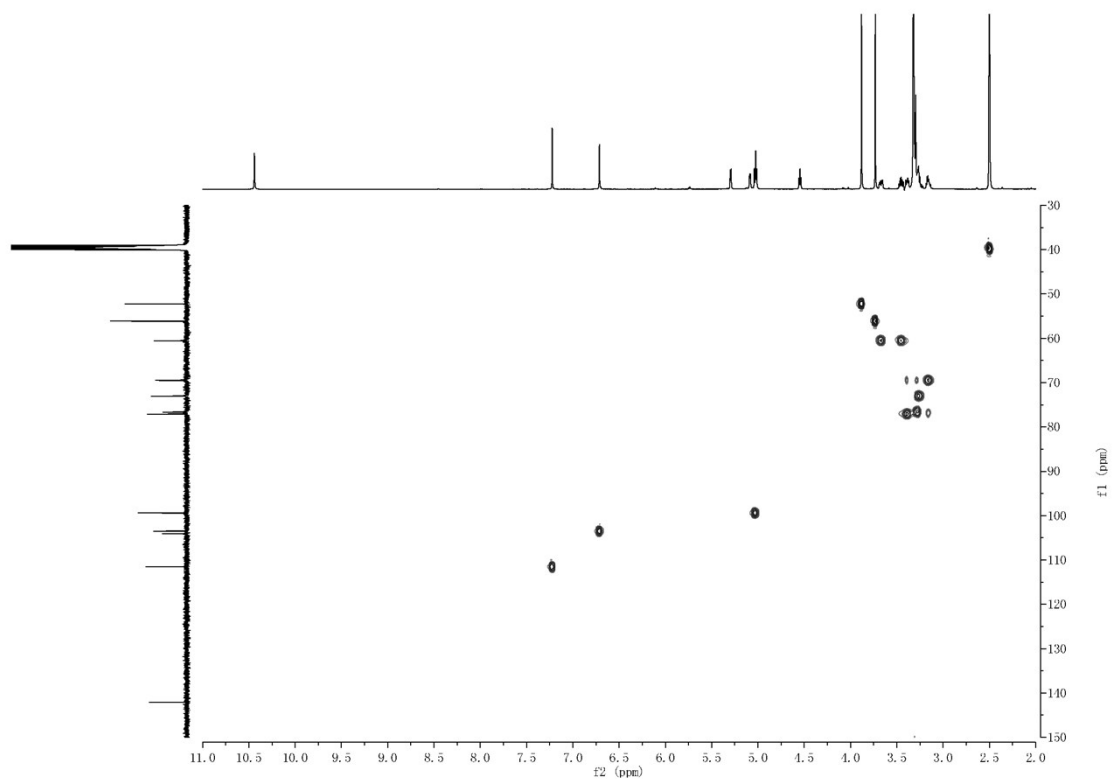

**Figure S51.** HSQC spectrum (500 MHz) of **6** in DMSO- $d_6$

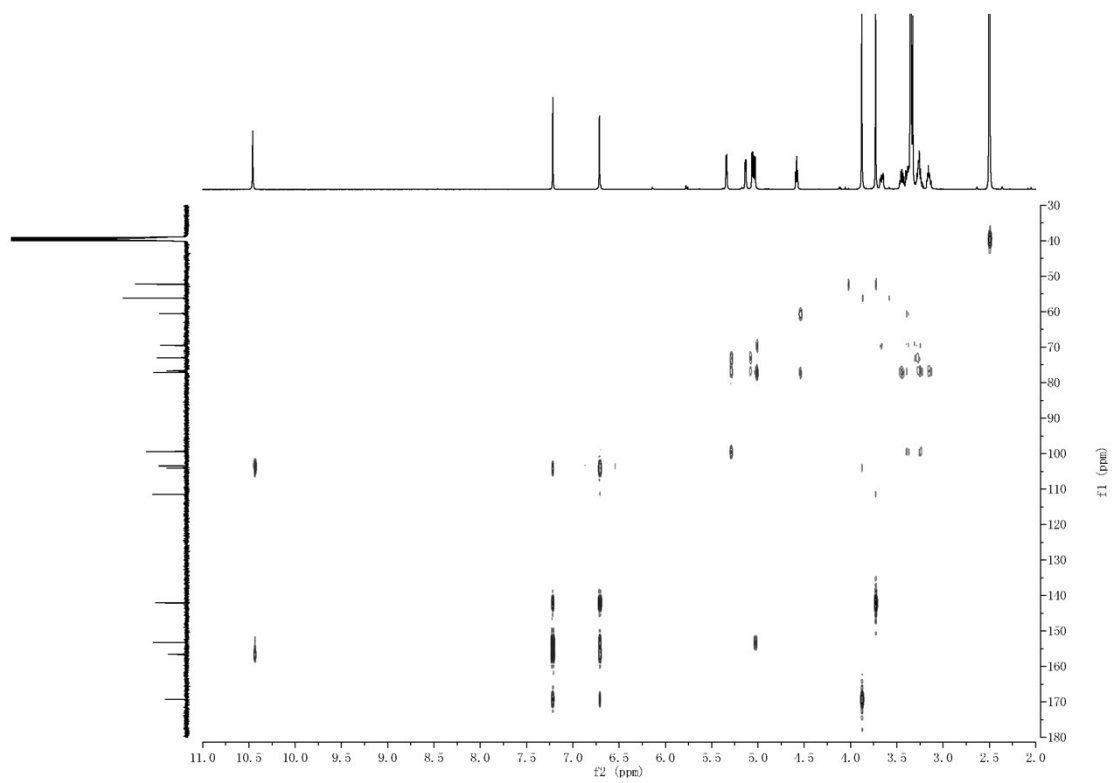

**Figure S52.** HMBC spectrum (500 MHz) of **6** in DMSO- $d_6$

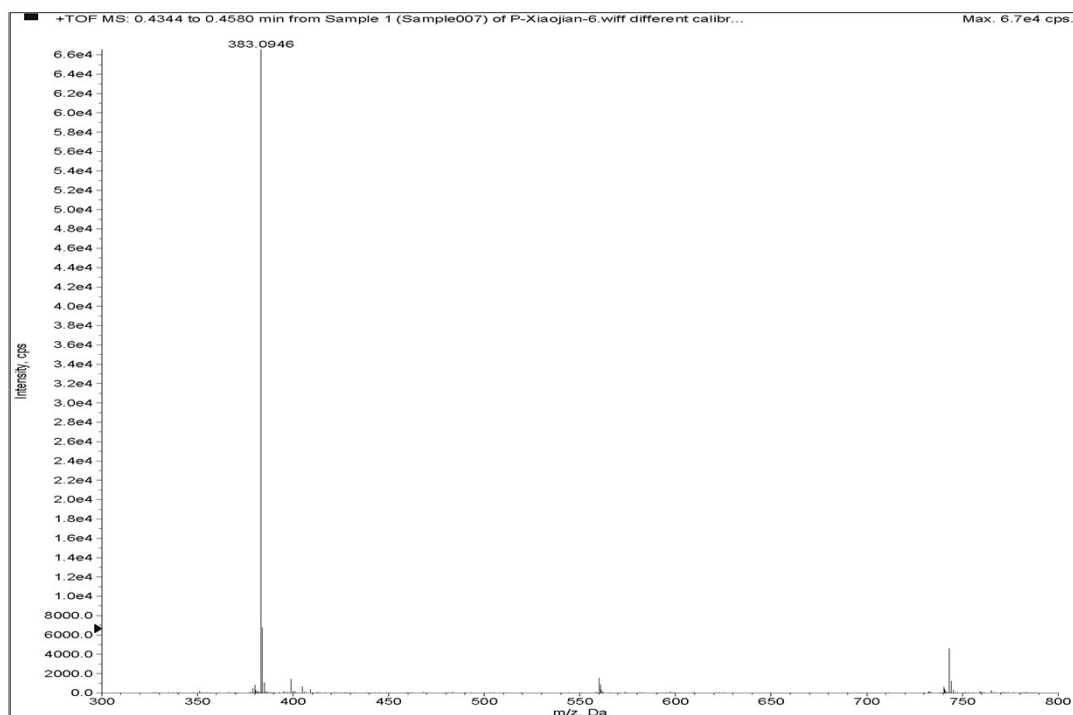Figure S53. HRESIMS spectrum of **6**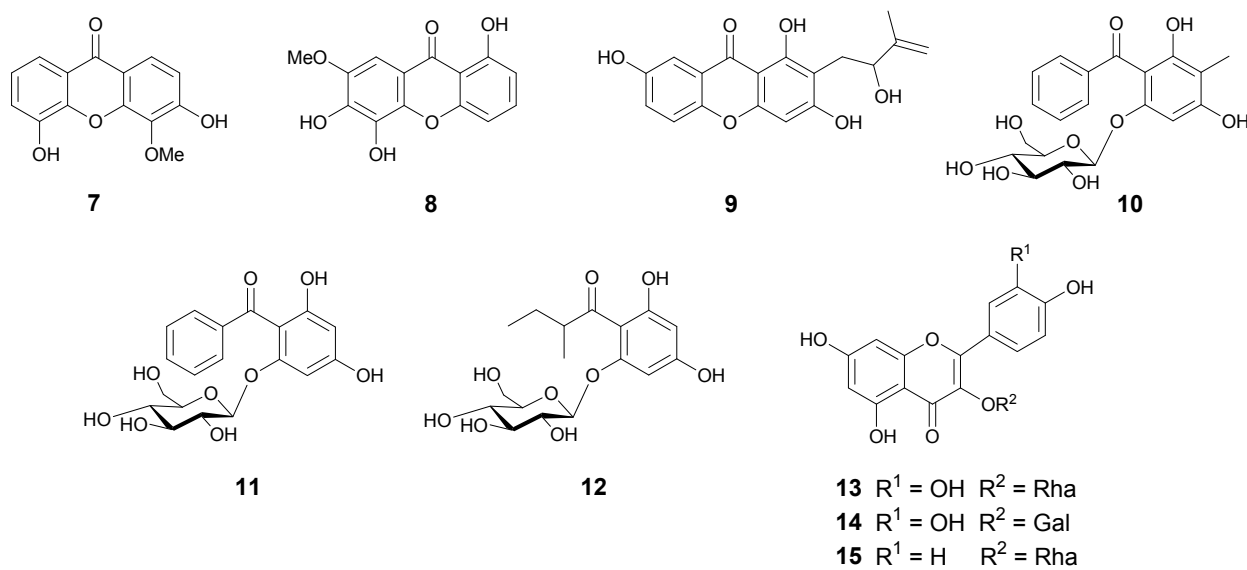Figure S54. Chemical structures of **7–15** from *Hypericum elatoides*
